# Supplementary material for: Titanium and zirconium amido complexes supported by imidazole-containing ligands: syntheses, characterization and catalytic activities
Source: Royal Society of Chemistry journal article supplement (doi:10.1039/c1ra00408e), 2011-10-26

## Supporting Information

**Title: Titanium and zirconium amido complexes supported by imidazole-containing ligands: syntheses, characterizations and catalytic activities**

**Authors:**

**Yang Zhao, Miaoshui Lin, Zhou Chen, Hao Pei, Yahong Li,\* Yanmei Chen, Xiufang Wang, Lei Li, Yanyuan Cao, Yong Zhang, and Wu Li**

1. Crystallography data for **2** and **6**·THF.
2.  $^1\text{H}$  and  $^{13}\text{C}$  NMR spectra for the complexes and ligand HL4.
3.  $^1\text{H}$  and  $^{13}\text{C}$  NMR spectra, IR and HRMS data for the hydroamination products.

## 1. Crystallography data for **2** and **6**·THF.

### 1.1 Crystal data and structure refinements for and **2** and **6**·THF

**Table 1** Crystal data and structure refinements for **2** and **6**·THF

| Complex                                        | <b>2</b>                                                          | <b>6</b> ·THF                                                     |
|------------------------------------------------|-------------------------------------------------------------------|-------------------------------------------------------------------|
| Empirical formula                              | C <sub>26</sub> H <sub>30</sub> Cl <sub>2</sub> N <sub>6</sub> Ti | C <sub>44</sub> H <sub>36</sub> Cl <sub>4</sub> N <sub>8</sub> Ti |
| Formula weight                                 | 545.36                                                            | 866.51                                                            |
| Temperature                                    | 223(2) K                                                          | 223(2) K                                                          |
| Wavelength                                     | 0.71073 Å                                                         | 0.71073 Å                                                         |
| Crystal system                                 | Orthorhombic                                                      | Triclinic                                                         |
| Space group                                    | <i>P</i> 2 <sub>1</sub> 2 <sub>1</sub> 2 <sub>1</sub>             | <i>P</i> -1                                                       |
| <i>a</i> /Å                                    | 11.829(2)                                                         | 8.9628(18)                                                        |
| <i>b</i> /Å                                    | 12.517(3)                                                         | 13.517(3)                                                         |
| <i>c</i> /Å                                    | 18.391(4)                                                         | 19.262(4)                                                         |
| <i>α</i> /°                                    | 90.00                                                             | 73.96(3)                                                          |
| <i>β</i> /°                                    | 90.00                                                             | 87.86(3)                                                          |
| <i>γ</i> /°                                    | 90.00                                                             | 74.76(3)                                                          |
| Volume/Å <sup>3</sup>                          | 2723.2(9)                                                         | 2162.3(8)                                                         |
| <i>ρ</i> /g cm <sup>-3</sup>                   | 1.330                                                             | 1.331                                                             |
| <i>Z</i>                                       | 4                                                                 | 2                                                                 |
| <i>F</i> (000)                                 | 1136                                                              | 892                                                               |
| Crystal size/mm                                | 0.20 x 0.15 x 0.15                                                | 0.40 x 0.20 x 0.20                                                |
| <i>θ</i> /°                                    | 3.24 to 25.30                                                     | 3.08 to 25.00                                                     |
| Limiting indices                               | -12< <i>h</i> <13<br>-10< <i>k</i> <15<br>-20< <i>l</i> <22       | -8< <i>h</i> <10<br>-16< <i>k</i> <15<br>-22< <i>l</i> <22        |
| Reflections collected / unique                 | 8641 / 4561                                                       | 17888 / 7536                                                      |
| Data/ restraints/ parameters                   | 4561 / 0 / 323                                                    | 7536 / 7 / 518                                                    |
| GOF                                            | 0.999                                                             | 1.099                                                             |
| R <sub>1</sub> , wR <sub>2</sub>               | R <sub>1</sub> = 0.0406                                           | R <sub>1</sub> = 0.0879                                           |
| [ I > 2σ(I) ]                                  | wR <sub>2</sub> = 0.0871                                          | wR <sub>2</sub> = 0.1709                                          |
| R <sub>1</sub> , wR <sub>2</sub>               | R <sub>1</sub> = 0.0452                                           | R <sub>1</sub> = 0.1400                                           |
| (all data)                                     | wR <sub>2</sub> = 0.0906                                          | wR <sub>2</sub> = 0.1971                                          |
| Largest diff. peak and hole /e. Å <sup>3</sup> | 0.222 and -0.231                                                  | 0.269 and -0.390                                                  |

## 1.2 Bond lengths (Å) and angles (°) for 2.

**Table 2** Bond lengths (Å) and angles (°) for 2

---

|             |          |
|-------------|----------|
| Ti(1)-N(4)  | 1.880(3) |
| Ti(1)-N(6)  | 1.902(3) |
| Ti(1)-N(5)  | 1.914(3) |
| Ti(1)-N(2)  | 2.142(2) |
| Ti(1)-N(1)  | 2.292(2) |
| Cl(2)-C(18) | 1.738(3) |
| N(2)-C(6)   | 1.368(3) |
| N(2)-C(7)   | 1.385(3) |
| Cl(1)-C(12) | 1.737(3) |
| N(1)-C(1)   | 1.339(4) |
| N(1)-C(5)   | 1.355(4) |
| C(7)-C(8)   | 1.400(4) |
| C(7)-C(9)   | 1.463(4) |
| C(6)-N(3)   | 1.330(4) |
| C(6)-C(5)   | 1.446(4) |
| C(8)-N(3)   | 1.380(4) |
| C(8)-C(15)  | 1.464(4) |
| C(15)-C(20) | 1.390(4) |
| C(15)-C(16) | 1.391(4) |
| C(20)-C(19) | 1.385(5) |
| N(6)-C(23)  | 1.446(5) |
| N(6)-C(24)  | 1.470(5) |
| C(4)-C(3)   | 1.379(5) |
| C(4)-C(5)   | 1.385(4) |
| C(1)-C(2)   | 1.369(5) |
| C(18)-C(17) | 1.368(4) |
| C(18)-C(19) | 1.391(5) |
| C(13)-C(12) | 1.372(5) |
| C(13)-C(14) | 1.385(4) |
| N(5)-C(21)  | 1.450(5) |
| N(5)-C(22)  | 1.469(4) |
| C(14)-C(9)  | 1.390(4) |
| C(9)-C(10)  | 1.388(4) |
| C(10)-C(11) | 1.387(4) |
| C(3)-C(2)   | 1.379(5) |
| C(17)-C(16) | 1.387(4) |
| N(4)-C(25)  | 1.439(5) |
| N(4)-C(26)  | 1.451(5) |
| C(11)-C(12) | 1.372(5) |

|                   |            |
|-------------------|------------|
| N(4)-Ti(1)-N(6)   | 98.21(13)  |
| N(4)-Ti(1)-N(5)   | 110.46(12) |
| N(6)-Ti(1)-N(5)   | 95.24(13)  |
| N(4)-Ti(1)-N(2)   | 124.57(11) |
| N(6)-Ti(1)-N(2)   | 96.20(10)  |
| N(5)-Ti(1)-N(2)   | 121.06(11) |
| N(4)-Ti(1)-N(1)   | 91.29(11)  |
| N(6)-Ti(1)-N(1)   | 168.59(10) |
| N(5)-Ti(1)-N(1)   | 87.28(11)  |
| N(2)-Ti(1)-N(1)   | 73.08(8)   |
| C(6)-N(2)-C(7)    | 103.9(2)   |
| C(6)-N(2)-Ti(1)   | 115.02(18) |
| C(7)-N(2)-Ti(1)   | 138.04(18) |
| C(1)-N(1)-C(5)    | 118.2(3)   |
| C(1)-N(1)-Ti(1)   | 126.8(2)   |
| C(5)-N(1)-Ti(1)   | 113.90(19) |
| N(2)-C(7)-C(8)    | 107.4(2)   |
| N(2)-C(7)-C(9)    | 124.0(2)   |
| C(8)-C(7)-C(9)    | 128.5(2)   |
| N(3)-C(6)-N(2)    | 115.2(3)   |
| N(3)-C(6)-C(5)    | 125.8(3)   |
| N(2)-C(6)-C(5)    | 118.9(3)   |
| N(3)-C(8)-C(7)    | 109.6(2)   |
| N(3)-C(8)-C(15)   | 120.6(2)   |
| C(7)-C(8)-C(15)   | 129.8(3)   |
| C(20)-C(15)-C(16) | 117.3(3)   |
| C(20)-C(15)-C(8)  | 120.0(3)   |
| C(16)-C(15)-C(8)  | 122.7(3)   |
| C(19)-C(20)-C(15) | 121.9(3)   |
| C(23)-N(6)-C(24)  | 109.7(4)   |
| C(23)-N(6)-Ti(1)  | 130.6(3)   |
| C(24)-N(6)-Ti(1)  | 119.6(3)   |
| C(3)-C(4)-C(5)    | 119.2(3)   |
| N(1)-C(1)-C(2)    | 122.9(3)   |
| C(6)-N(3)-C(8)    | 103.8(2)   |
| C(17)-C(18)-C(19) | 121.0(3)   |
| C(17)-C(18)-Cl(2) | 119.9(2)   |
| C(19)-C(18)-Cl(2) | 119.1(2)   |
| C(12)-C(13)-C(14) | 119.2(3)   |
| N(1)-C(5)-C(4)    | 121.6(3)   |
| N(1)-C(5)-C(6)    | 113.2(3)   |
| C(4)-C(5)-C(6)    | 125.2(3)   |
| C(21)-N(5)-C(22)  | 108.9(3)   |

|                   |          |
|-------------------|----------|
| C(21)-N(5)-Ti(1)  | 128.4(2) |
| C(22)-N(5)-Ti(1)  | 122.4(3) |
| C(13)-C(14)-C(9)  | 121.1(3) |
| C(14)-C(9)-C(10)  | 118.5(3) |
| C(14)-C(9)-C(7)   | 119.8(3) |
| C(10)-C(9)-C(7)   | 121.7(3) |
| C(11)-C(10)-C(9)  | 120.3(3) |
| C(4)-C(3)-C(2)    | 119.0(3) |
| C(18)-C(17)-C(16) | 119.2(3) |
| C(25)-N(4)-C(26)  | 112.4(3) |
| C(25)-N(4)-Ti(1)  | 115.6(2) |
| C(26)-N(4)-Ti(1)  | 132.0(3) |
| C(17)-C(16)-C(15) | 121.8(3) |
| C(20)-C(19)-C(18) | 118.7(3) |
| C(12)-C(11)-C(10) | 120.0(3) |
| C(11)-C(12)-C(13) | 120.8(3) |
| C(11)-C(12)-Cl(1) | 120.0(3) |
| C(13)-C(12)-Cl(1) | 119.2(3) |
| C(1)-C(2)-C(3)    | 119.1(3) |

---

**Table 3** Bond lengths (Å) and angles (°) for **6**·THF.

---

|             |          |
|-------------|----------|
| Cl(1)-C(12) | 1.744(6) |
| N(1)-C(6)   | 1.370(6) |
| N(1)-C(8)   | 1.394(6) |
| N(1)-Ti(2)  | 2.124(4) |
| C(1)-N(3)   | 1.347(6) |
| C(1)-C(2)   | 1.379(7) |
| C(1)-C(6)   | 1.448(7) |
| Ti(2)-N(8)  | 1.880(5) |
| Ti(2)-N(7)  | 1.902(4) |
| Ti(2)-N(4)  | 2.152(4) |
| Ti(2)-N(3)  | 2.308(4) |
| Ti(2)-N(6)  | 2.314(5) |
| Cl(2)-C(18) | 1.734(6) |
| N(2)-C(6)   | 1.326(6) |
| N(2)-C(7)   | 1.370(6) |
| C(2)-C(3)   | 1.373(8) |
| C(2)-H(2)   | 0.9400   |
| Cl(3)-C(32) | 1.741(5) |
| N(3)-C(5)   | 1.360(6) |
| C(3)-C(4)   | 1.388(8) |

|             |          |
|-------------|----------|
| C(3)-H(3)   | 0.9400   |
| Cl(4)-C(38) | 1.741(6) |
| N(4)-C(26)  | 1.364(6) |
| N(4)-C(28)  | 1.392(6) |
| C(4)-C(5)   | 1.368(8) |
| C(4)-H(4)   | 0.9400   |
| N(5)-C(26)  | 1.350(6) |
| N(5)-C(27)  | 1.365(6) |
| C(5)-H(5)   | 0.9400   |
| N(6)-C(25)  | 1.343(7) |
| N(6)-C(21)  | 1.359(6) |
| N(7)-C(41)  | 1.475(7) |
| N(7)-C(42)  | 1.476(7) |
| C(7)-C(8)   | 1.387(7) |
| C(7)-C(9)   | 1.484(7) |
| N(8)-C(44)  | 1.469(7) |
| N(8)-C(43)  | 1.477(7) |
| C(8)-C(15)  | 1.476(7) |
| C(9)-C(10)  | 1.387(7) |
| C(9)-C(14)  | 1.393(7) |
| C(10)-C(11) | 1.402(7) |
| C(10)-H(10) | 0.9400   |
| C(11)-C(12) | 1.362(8) |
| C(11)-H(11) | 0.9400   |
| C(12)-C(13) | 1.378(8) |
| C(13)-C(14) | 1.374(8) |
| C(13)-H(13) | 0.9400   |
| C(14)-H(14) | 0.9400   |
| C(15)-C(20) | 1.388(7) |
| C(15)-C(16) | 1.388(7) |
| C(16)-C(17) | 1.390(8) |
| C(16)-H(16) | 0.9400   |
| C(17)-C(18) | 1.379(9) |
| C(17)-H(17) | 0.9400   |
| C(18)-C(19) | 1.368(9) |
| C(19)-C(20) | 1.380(8) |
| C(19)-H(19) | 0.9400   |
| C(20)-H(20) | 0.9400   |
| C(21)-C(22) | 1.378(7) |
| C(21)-C(26) | 1.446(7) |
| C(22)-C(23) | 1.366(7) |
| C(22)-H(22) | 0.9400   |
| C(23)-C(24) | 1.390(7) |
| C(23)-H(23) | 0.9400   |

|                 |          |
|-----------------|----------|
| C(24)-C(25)     | 1.380(7) |
| C(24)-H(24)     | 0.9400   |
| C(25)-H(25)     | 0.9400   |
| C(27)-C(28)     | 1.386(7) |
| C(27)-C(29)     | 1.484(7) |
| C(28)-C(35)     | 1.477(7) |
| C(29)-C(30)     | 1.380(7) |
| C(29)-C(34)     | 1.390(7) |
| C(30)-C(31)     | 1.383(7) |
| C(30)-H(30)     | 0.9400   |
| C(31)-C(32)     | 1.368(8) |
| C(31)-H(31)     | 0.9400   |
| C(32)-C(33)     | 1.368(8) |
| C(33)-C(34)     | 1.372(7) |
| C(33)-H(33)     | 0.9400   |
| C(34)-H(34)     | 0.9400   |
| C(35)-C(36)     | 1.386(7) |
| C(35)-C(40)     | 1.387(7) |
| C(36)-C(37)     | 1.380(8) |
| C(36)-H(36)     | 0.9400   |
| C(37)-C(38)     | 1.392(8) |
| C(37)-H(37)     | 0.9400   |
| C(38)-C(39)     | 1.392(8) |
| C(39)-C(40)     | 1.377(8) |
| C(39)-H(39)     | 0.9400   |
| C(40)-H(40)     | 0.9400   |
| C(41)-H(41A)    | 0.9700   |
| C(41)-H(41B)    | 0.9700   |
| C(41)-H(41C)    | 0.9700   |
| C(42)-H(42A)    | 0.9700   |
| C(42)-H(42B)    | 0.9700   |
| C(42)-H(42C)    | 0.9700   |
| C(43)-H(43A)    | 0.9700   |
| C(43)-H(43B)    | 0.9700   |
| C(43)-H(43C)    | 0.9700   |
| C(44)-H(44A)    | 0.9700   |
| C(44)-H(44B)    | 0.9700   |
| C(44)-H(44C)    | 0.9700   |
| C(6)-N(1)-C(8)  | 103.4(4) |
| C(6)-N(1)-Ti(2) | 115.9(3) |
| C(8)-N(1)-Ti(2) | 140.1(3) |
| N(3)-C(1)-C(2)  | 122.0(5) |
| N(3)-C(1)-C(6)  | 115.2(4) |

|                  |            |
|------------------|------------|
| C(2)-C(1)-C(6)   | 122.7(5)   |
| N(8)-Ti(2)-N(7)  | 104.9(2)   |
| N(8)-Ti(2)-N(1)  | 97.18(18)  |
| N(7)-Ti(2)-N(1)  | 100.82(18) |
| N(8)-Ti(2)-N(4)  | 100.11(18) |
| N(7)-Ti(2)-N(4)  | 96.49(17)  |
| N(1)-Ti(2)-N(4)  | 151.44(16) |
| N(8)-Ti(2)-N(3)  | 87.00(17)  |
| N(7)-Ti(2)-N(3)  | 167.93(18) |
| N(1)-Ti(2)-N(3)  | 75.20(15)  |
| N(4)-Ti(2)-N(3)  | 83.16(15)  |
| N(8)-Ti(2)-N(6)  | 160.54(17) |
| N(7)-Ti(2)-N(6)  | 94.23(18)  |
| N(1)-Ti(2)-N(6)  | 82.41(16)  |
| N(4)-Ti(2)-N(6)  | 73.77(16)  |
| N(3)-Ti(2)-N(6)  | 74.04(15)  |
| C(6)-N(2)-C(7)   | 103.6(4)   |
| C(3)-C(2)-C(1)   | 120.2(6)   |
| C(3)-C(2)-H(2)   | 119.9      |
| C(1)-C(2)-H(2)   | 119.9      |
| C(1)-N(3)-C(5)   | 117.1(5)   |
| C(1)-N(3)-Ti(2)  | 113.3(3)   |
| C(5)-N(3)-Ti(2)  | 129.7(4)   |
| C(2)-C(3)-C(4)   | 118.6(6)   |
| C(2)-C(3)-H(3)   | 120.7      |
| C(4)-C(3)-H(3)   | 120.7      |
| C(26)-N(4)-C(28) | 103.5(4)   |
| C(26)-N(4)-Ti(2) | 115.6(3)   |
| C(28)-N(4)-Ti(2) | 139.6(4)   |
| C(5)-C(4)-C(3)   | 118.5(6)   |
| C(5)-C(4)-H(4)   | 120.7      |
| C(3)-C(4)-H(4)   | 120.7      |
| C(26)-N(5)-C(27) | 103.3(4)   |
| N(3)-C(5)-C(4)   | 123.6(5)   |
| N(3)-C(5)-H(5)   | 118.2      |
| C(4)-C(5)-H(5)   | 118.2      |
| C(25)-N(6)-C(21) | 117.5(5)   |
| C(25)-N(6)-Ti(2) | 127.9(4)   |
| C(21)-N(6)-Ti(2) | 114.3(3)   |
| N(2)-C(6)-N(1)   | 115.3(4)   |
| N(2)-C(6)-C(1)   | 124.8(5)   |
| N(1)-C(6)-C(1)   | 119.9(4)   |
| C(41)-N(7)-C(42) | 107.7(5)   |
| C(41)-N(7)-Ti(2) | 127.4(4)   |



|                   |          |
|-------------------|----------|
| C(42)-N(7)-Ti(2)  | 124.6(4) |
| N(2)-C(7)-C(8)    | 110.6(4) |
| N(2)-C(7)-C(9)    | 119.4(4) |
| C(8)-C(7)-C(9)    | 129.8(5) |
| C(44)-N(8)-C(43)  | 110.2(5) |
| C(44)-N(8)-Ti(2)  | 129.8(4) |
| C(43)-N(8)-Ti(2)  | 118.7(4) |
| C(7)-C(8)-N(1)    | 107.1(4) |
| C(7)-C(8)-C(15)   | 130.8(5) |
| N(1)-C(8)-C(15)   | 121.8(4) |
| C(10)-C(9)-C(14)  | 116.9(5) |
| C(10)-C(9)-C(7)   | 118.0(5) |
| C(14)-C(9)-C(7)   | 125.0(5) |
| C(9)-C(10)-C(11)  | 121.6(5) |
| C(9)-C(10)-H(10)  | 119.2    |
| C(11)-C(10)-H(10) | 119.2    |
| C(12)-C(11)-C(10) | 119.2(5) |
| C(12)-C(11)-H(11) | 120.4    |
| C(10)-C(11)-H(11) | 120.4    |
| C(11)-C(12)-C(13) | 120.7(5) |
| C(11)-C(12)-Cl(1) | 119.0(4) |
| C(13)-C(12)-Cl(1) | 120.3(5) |
| C(14)-C(13)-C(12) | 119.6(5) |
| C(14)-C(13)-H(13) | 120.2    |
| C(12)-C(13)-H(13) | 120.2    |
| C(13)-C(14)-C(9)  | 122.0(5) |
| C(13)-C(14)-H(14) | 119.0    |
| C(9)-C(14)-H(14)  | 119.0    |
| C(20)-C(15)-C(16) | 117.5(5) |
| C(20)-C(15)-C(8)  | 122.8(5) |
| C(16)-C(15)-C(8)  | 119.7(5) |
| C(15)-C(16)-C(17) | 121.7(6) |
| C(15)-C(16)-H(16) | 119.2    |
| C(17)-C(16)-H(16) | 119.2    |
| C(18)-C(17)-C(16) | 118.4(6) |
| C(18)-C(17)-H(17) | 120.8    |
| C(16)-C(17)-H(17) | 120.8    |
| C(19)-C(18)-C(17) | 121.6(5) |
| C(19)-C(18)-Cl(2) | 119.4(5) |
| C(17)-C(18)-Cl(2) | 118.9(5) |
| C(18)-C(19)-C(20) | 118.9(6) |
| C(18)-C(19)-H(19) | 120.6    |
| C(20)-C(19)-H(19) | 120.6    |
| C(19)-C(20)-C(15) | 121.9(6) |

|                   |          |
|-------------------|----------|
| C(19)-C(20)-H(20) | 119.1    |
| C(15)-C(20)-H(20) | 119.1    |
| N(6)-C(21)-C(22)  | 122.9(5) |
| N(6)-C(21)-C(26)  | 113.7(5) |
| C(22)-C(21)-C(26) | 123.4(5) |
| C(23)-C(22)-C(21) | 118.1(5) |
| C(23)-C(22)-H(22) | 121.0    |
| C(21)-C(22)-H(22) | 121.0    |
| C(22)-C(23)-C(24) | 120.7(5) |
| C(22)-C(23)-H(23) | 119.6    |
| C(24)-C(23)-H(23) | 119.6    |
| C(25)-C(24)-C(23) | 117.6(5) |
| C(25)-C(24)-H(24) | 121.2    |
| C(23)-C(24)-H(24) | 121.2    |
| N(6)-C(25)-C(24)  | 123.2(5) |
| N(6)-C(25)-H(25)  | 118.4    |
| C(24)-C(25)-H(25) | 118.4    |
| N(5)-C(26)-N(4)   | 114.9(5) |
| N(5)-C(26)-C(21)  | 124.7(5) |
| N(4)-C(26)-C(21)  | 120.4(4) |
| N(5)-C(27)-C(28)  | 110.6(4) |
| N(5)-C(27)-C(29)  | 119.2(5) |
| C(28)-C(27)-C(29) | 130.1(5) |
| C(27)-C(28)-N(4)  | 107.6(4) |
| C(27)-C(28)-C(35) | 130.1(5) |
| N(4)-C(28)-C(35)  | 122.2(4) |
| C(30)-C(29)-C(34) | 118.0(5) |
| C(30)-C(29)-C(27) | 120.8(5) |
| C(34)-C(29)-C(27) | 121.2(5) |
| C(29)-C(30)-C(31) | 120.9(5) |
| C(29)-C(30)-H(30) | 119.5    |
| C(31)-C(30)-H(30) | 119.5    |
| C(32)-C(31)-C(30) | 119.8(5) |
| C(32)-C(31)-H(31) | 120.1    |
| C(30)-C(31)-H(31) | 120.1    |
| C(33)-C(32)-C(31) | 120.3(5) |
| C(33)-C(32)-Cl(3) | 119.0(5) |
| C(31)-C(32)-Cl(3) | 120.7(4) |
| C(32)-C(33)-C(34) | 120.0(5) |
| C(32)-C(33)-H(33) | 120.0    |
| C(34)-C(33)-H(33) | 120.0    |
| C(33)-C(34)-C(29) | 121.0(5) |
| C(33)-C(34)-H(34) | 119.5    |
| C(29)-C(34)-H(34) | 119.5    |

|                     |          |
|---------------------|----------|
| C(36)-C(35)-C(40)   | 117.9(5) |
| C(36)-C(35)-C(28)   | 122.0(5) |
| C(40)-C(35)-C(28)   | 120.0(5) |
| C(37)-C(36)-C(35)   | 121.6(6) |
| C(37)-C(36)-H(36)   | 119.2    |
| C(35)-C(36)-H(36)   | 119.2    |
| C(36)-C(37)-C(38)   | 119.3(6) |
| C(36)-C(37)-H(37)   | 120.4    |
| C(38)-C(37)-H(37)   | 120.4    |
| C(37)-C(38)-C(39)   | 120.2(6) |
| C(37)-C(38)-Cl(4)   | 120.2(5) |
| C(39)-C(38)-Cl(4)   | 119.5(5) |
| C(40)-C(39)-C(38)   | 119.0(6) |
| C(40)-C(39)-H(39)   | 120.5    |
| C(38)-C(39)-H(39)   | 120.5    |
| C(39)-C(40)-C(35)   | 122.0(6) |
| C(39)-C(40)-H(40)   | 119.0    |
| C(35)-C(40)-H(40)   | 119.0    |
| N(7)-C(41)-H(41A)   | 109.5    |
| N(7)-C(41)-H(41B)   | 109.5    |
| H(41A)-C(41)-H(41B) | 109.5    |
| N(7)-C(41)-H(41C)   | 109.5    |
| H(41A)-C(41)-H(41C) | 109.5    |
| H(41B)-C(41)-H(41C) | 109.5    |
| N(7)-C(42)-H(42A)   | 109.5    |
| N(7)-C(42)-H(42B)   | 109.5    |
| H(42A)-C(42)-H(42B) | 109.5    |
| N(7)-C(42)-H(42C)   | 109.5    |
| H(42A)-C(42)-H(42C) | 109.5    |
| H(42B)-C(42)-H(42C) | 109.5    |
| N(8)-C(43)-H(43A)   | 109.5    |
| N(8)-C(43)-H(43B)   | 109.5    |
| H(43A)-C(43)-H(43B) | 109.5    |
| N(8)-C(43)-H(43C)   | 109.5    |
| H(43A)-C(43)-H(43C) | 109.5    |
| H(43B)-C(43)-H(43C) | 109.5    |
| N(8)-C(44)-H(44A)   | 109.5    |
| N(8)-C(44)-H(44B)   | 109.5    |
| H(44A)-C(44)-H(44B) | 109.5    |
| N(8)-C(44)-H(44C)   | 109.5    |
| H(44A)-C(44)-H(44C) | 109.5    |
| H(44B)-C(44)-H(44C) | 109.5    |

---

## 2. $^1\text{H}$ and $^{13}\text{C}$ NMR spectra for the complexes.

### 2.1 $^1\text{H}$ and $^{13}\text{C}$ NMR spectra for **1**

$^1\text{H}$  NMR (400 MHz,  $\text{CDCl}_3$ )  $\delta$  8.15(d, 1H), 7.83 (d, 1H), 7.35 (m, 2H), 7.19 (m, 5H), 7.11 (m, 3H), 7.05 (m, 2H), 2.84 (s, 18H);  $^{13}\text{C}$  NMR (100 MHz,  $\text{CDCl}_3$ )  $\delta$  153.70, 149.95, 147.47, 139.60, 136.02, 130.85, 130.79, 129.25, 128.44, 128.23, 128.19, 128.08, 127.92, 127.51, 127.46, 126.62, 126.22, 125.82, 125.48, 121.71, 119.21, 46.16

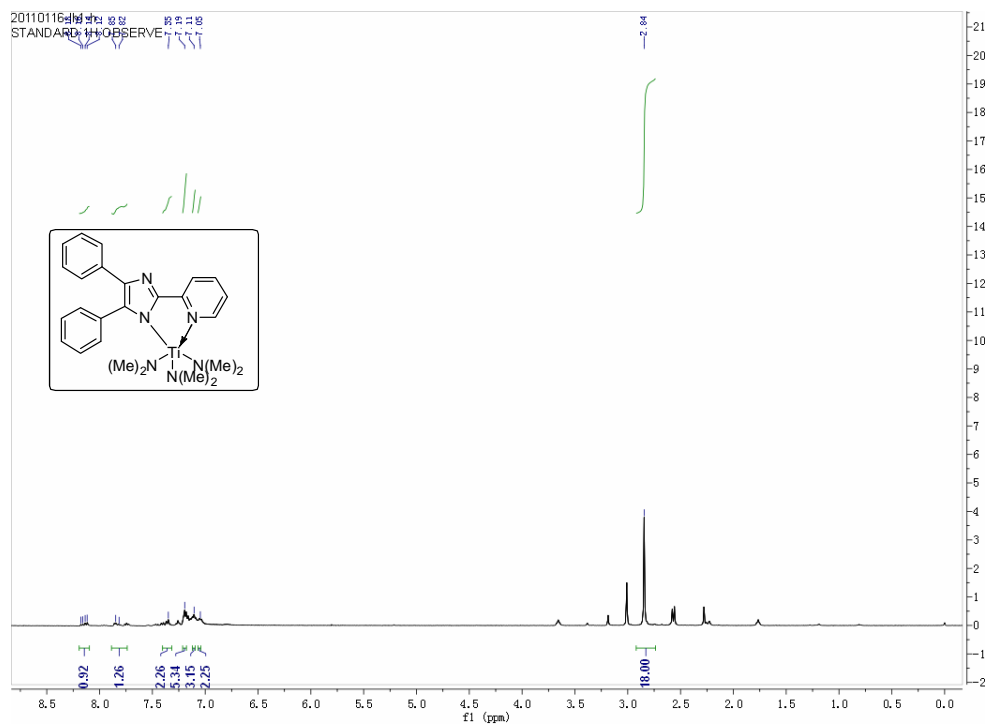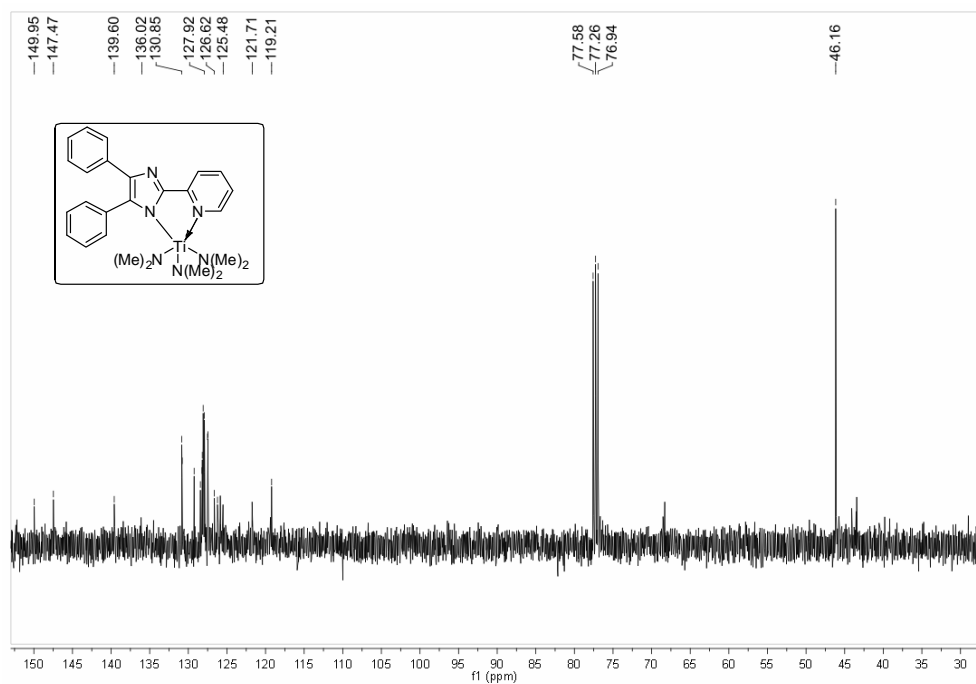

## 2.2 $^1\text{H}$ and $^{13}\text{C}$ NMR spectra for **2**

$^1\text{H}$ NMR (400 MHz,  $\text{CDCl}_3$ )  $\delta$  = 8.18 (d, 1H), 7.93 (d, 1H), 7.84 (t, 1H), 7.36 (d, 2H), 7.27-7.25 (d, 2H), 7.22–7.13 (m, 5H), 2.93 (s, 18H).  $^{13}\text{C}$ NMR(100MHz,  $\text{CDCl}_3$ )  $\delta$  = 154.10, 152.20, 147.86, 140.76, 140.01, 139.64, 134.74, 134.52, 132.89, 132.11, 131.92, 129.34, 128.53, 127.95, 122.27, 119.48, 46.33.

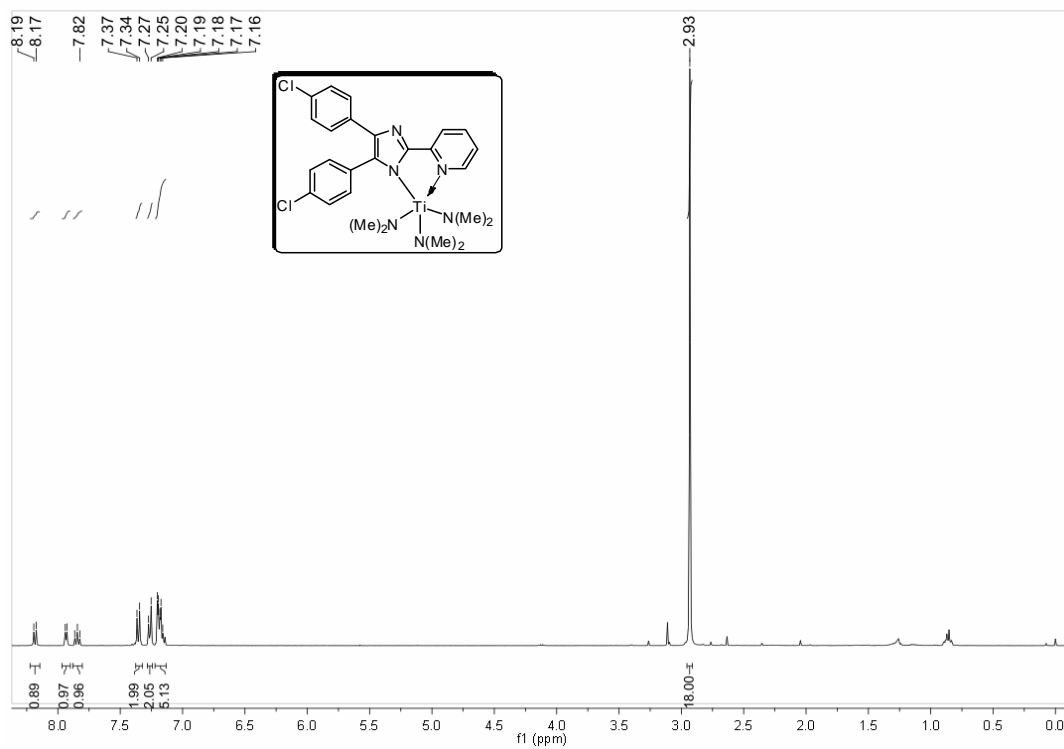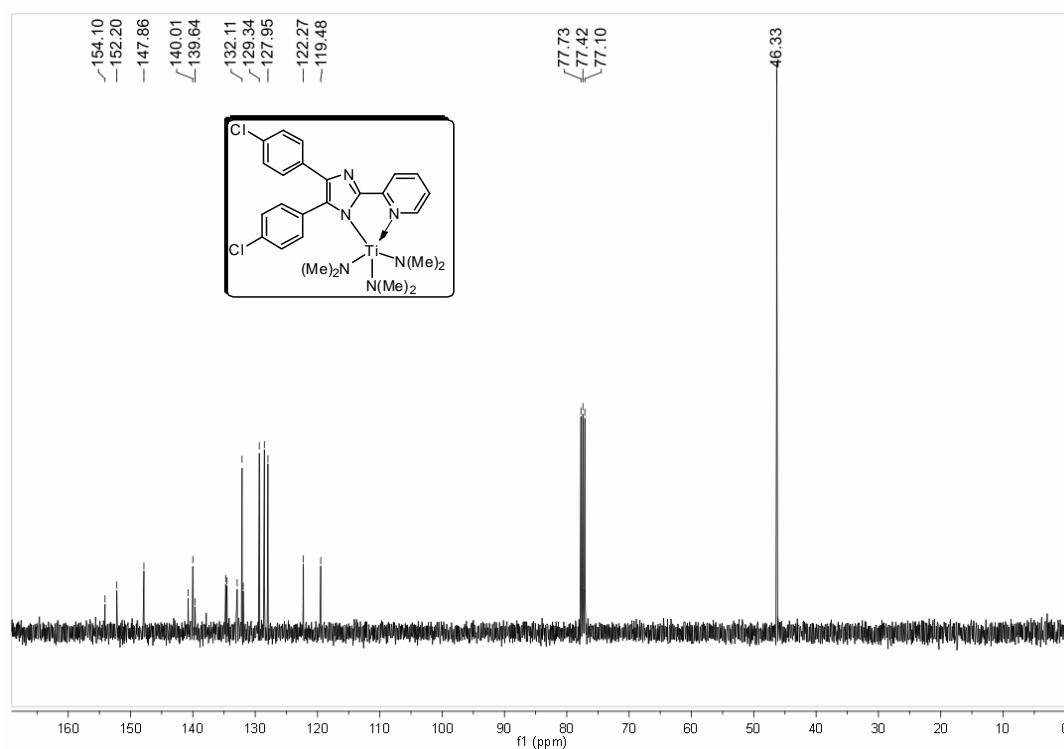

### 2.3 $^1\text{H}$ and $^{13}\text{C}$ NMR spectra for **3**

**$^1\text{H}$  NMR (400 MHz,  $\text{CDCl}_3$ )**  $\delta$  8.16 (t, 1H), 7.88 (d, 1H), 7.26 (s, 3H), 7.06 (s, 1H), 6.98 (d, 1H), 6.90 (d, 1H), 6.81 (d, 2H), 6.71–6.66 (m, 2H), 3.67 (s, 3H), 3.31 (s, 3H), 2.92 (s, 18H).  **$^{13}\text{C}$  NMR (75 MHz,  $\text{CDCl}_3$ )**  $\delta$  158.41, 157.91, 152.18, 149.61, 147.34, 140.45, 139.49, 131.89, 129.00, 128.58, 121.58, 119.07, 113.68, 113.61, 113.54, 113.00, 55.45, 55.35, 46.17.

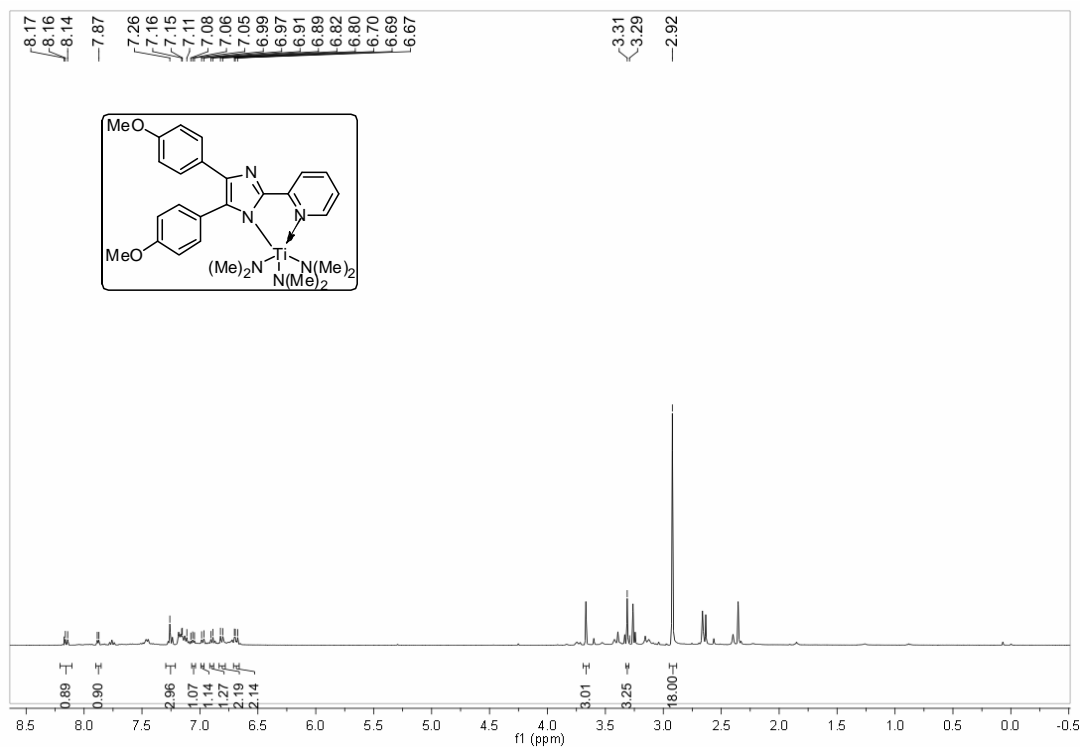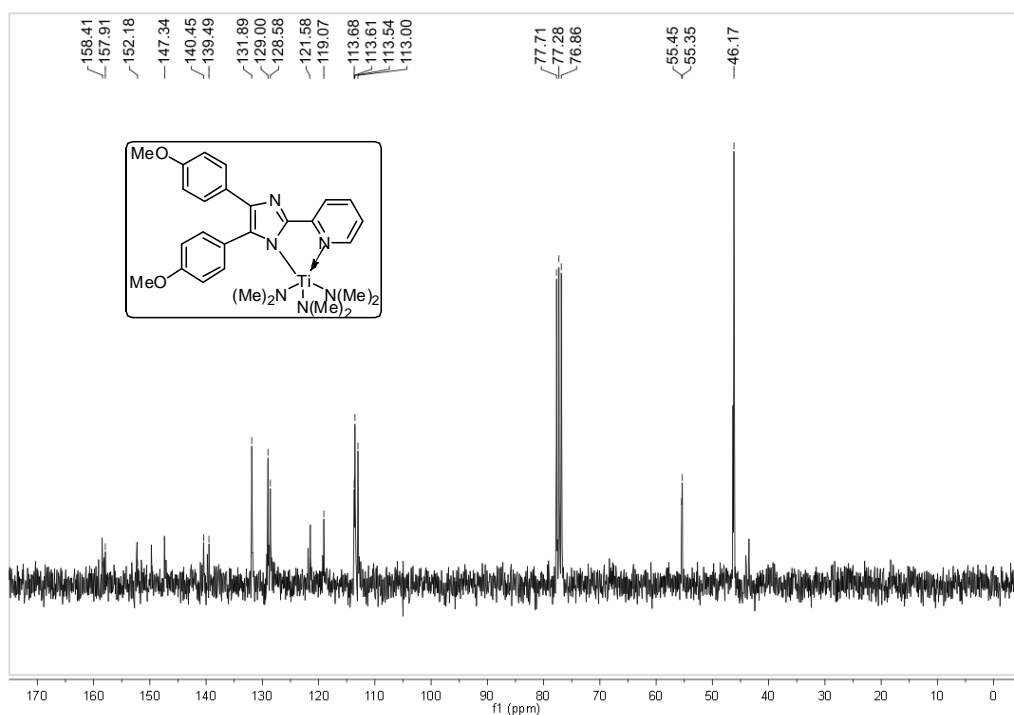

## 2.4 $^1\text{H}$ and $^{13}\text{C}$ NMR spectra for **4**·THF

**$^1\text{H}$  NMR (400 MHz,  $\text{CDCl}_3$ )**  $\delta$  8.15 (d, 1H), 7.88 (d, 1H), 7.76 (s, 1H), 7.46 (s, 1H), 7.18 (s, 4H), 6.98 (d, 1H), 6.82 (m, 1H), 6.71–6.67 (m, 2H), 3.67 (s, 3H), 3.31 (s, 3H), 3.26 (s, 3H), 2.92 (s, 18H), 2.35 (s, 3H).  **$^{13}\text{C}$  NMR (75 MHz,  $\text{CDCl}_3$ )**  $\delta$  157.82, 156.98, 152.02, 148.76, 139.96, 132.25, 131.66, 128.43, 128.06, 125.73, 121.79, 120.41, 119.92, 119.11, 110.81, 110.43, 68.26, 46.65, 44.08, 43.50, 25.72.

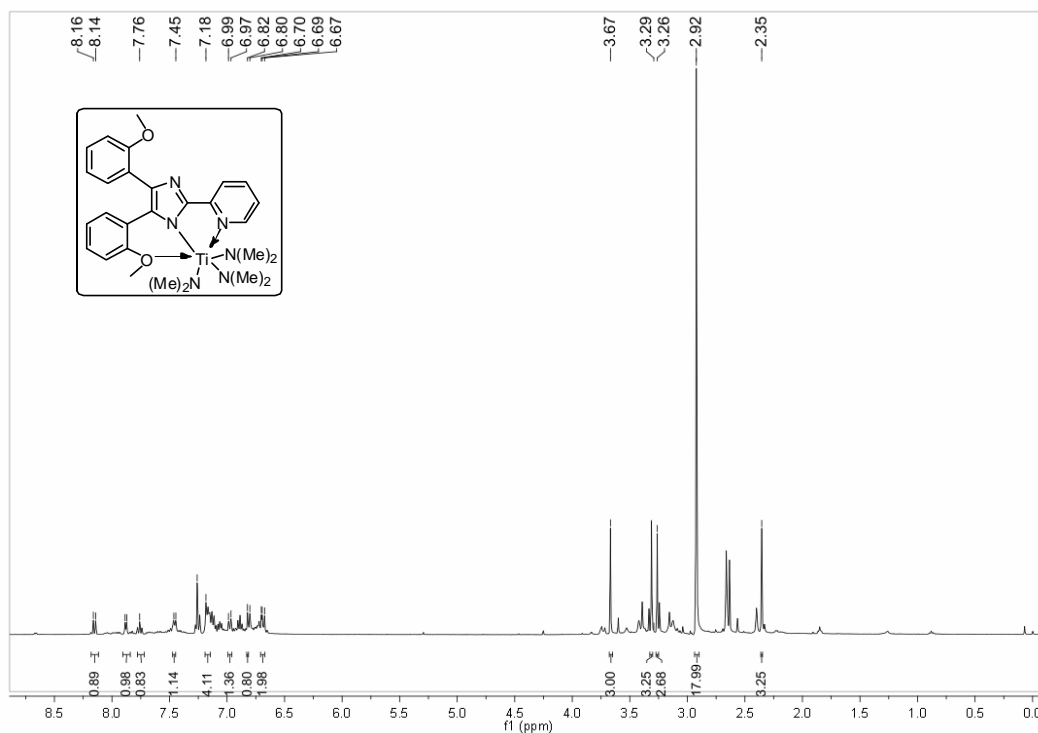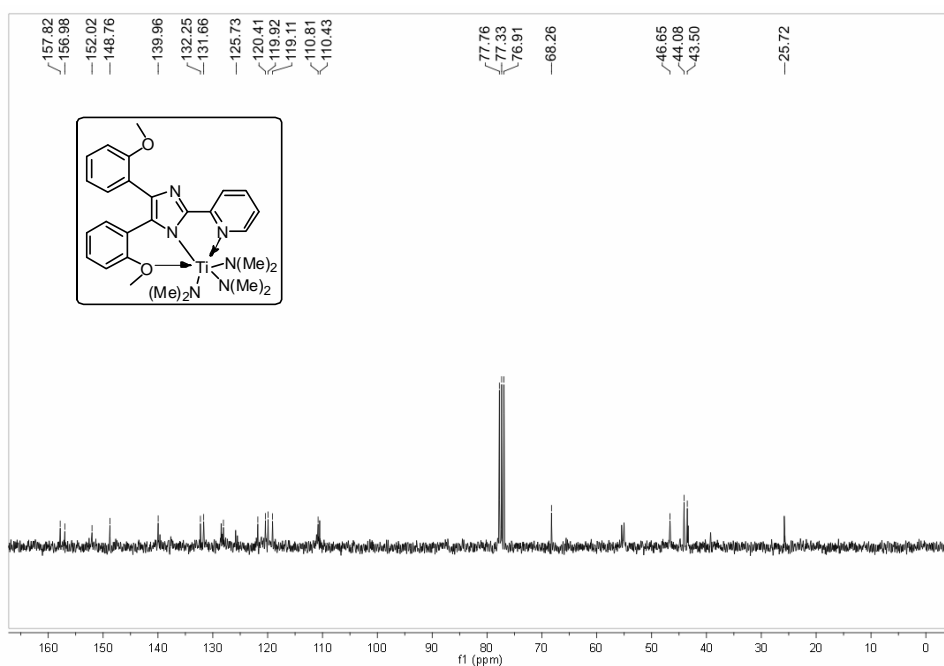

## 2.5 $^1\text{H}$ and $^{13}\text{C}$ NMR spectra for **5**·THF

**$^1\text{H}$  NMR (300 MHz,  $\text{CDCl}_3$ )**  $\delta$  8.12 (d, 2H), 7.60 (d, 6H), 7.45 (s, 6H), 7.33 (s, 7H), 7.22 (d, 3H), 7.14 (d, 2H), 6.88 (t, 2H), 3.73 (s, 5H), 2.61 (s, 12H), 1.83 (s, 5H);  **$^{13}\text{C}$  NMR (75 MHz,  $\text{CDCl}_3$ )**  $\delta$  146.71, 146.03, 141.22, 136.32, 134.89, 133.88, 131.95, 131.26, 126.53, 123.49, 123.30, 122.78, 122.71, 121.27, 117.23, 115.12, 63.49, 42.64, 21.02.

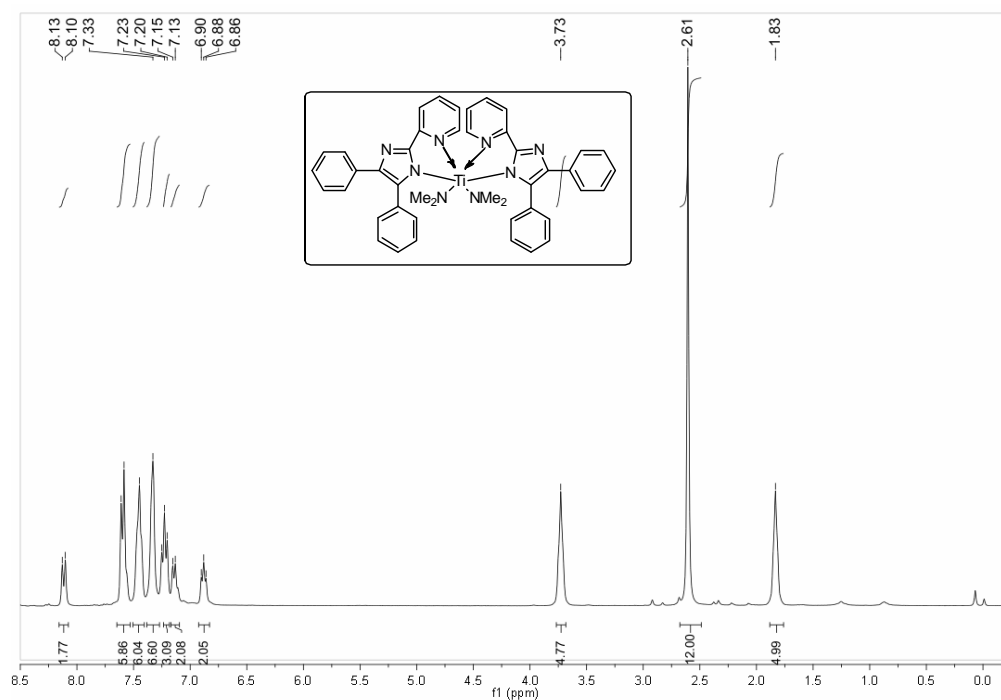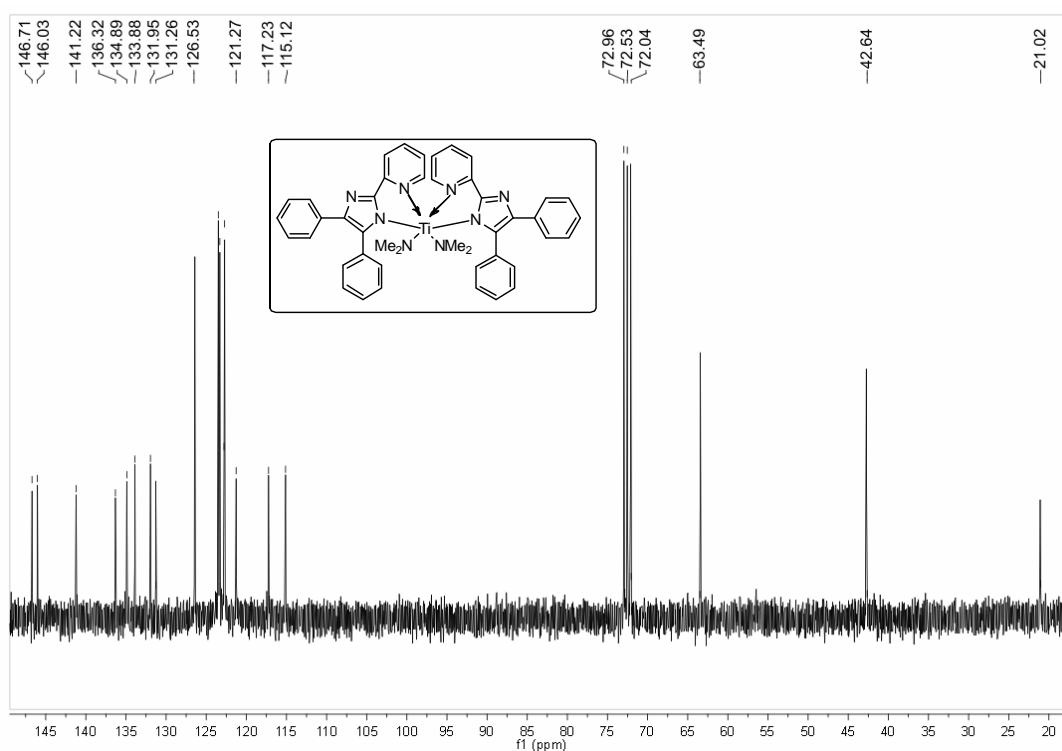



## 2.6 $^1\text{H}$ and $^{13}\text{C}$ NMR spectra for **6**·THF

**$^1\text{H}$  NMR (400 MHz,  $\text{CDCl}_3$ ):**  $\delta$  = 8.13 (s, 2 H), 7.65 (s, 2 H), 7.45 (d, 18 H), 6.95 (s, 2 H), 3.75 (s, 4 H), 2.66 (s, 12 H), 1.84 (s, 4 H).  **$^{13}\text{C}$  NMR (100 MHz,  $\text{CDCl}_3$ ):**  $\delta$  = 151.10, 151.02, 145.70, 140.30, 138.86, 138.18, 134.72, 134.13, 133.65, 132.21, 131.86, 128.69, 128.40, 128.32, 122.32, 120.00, 68.09, 47.60, 25.74.

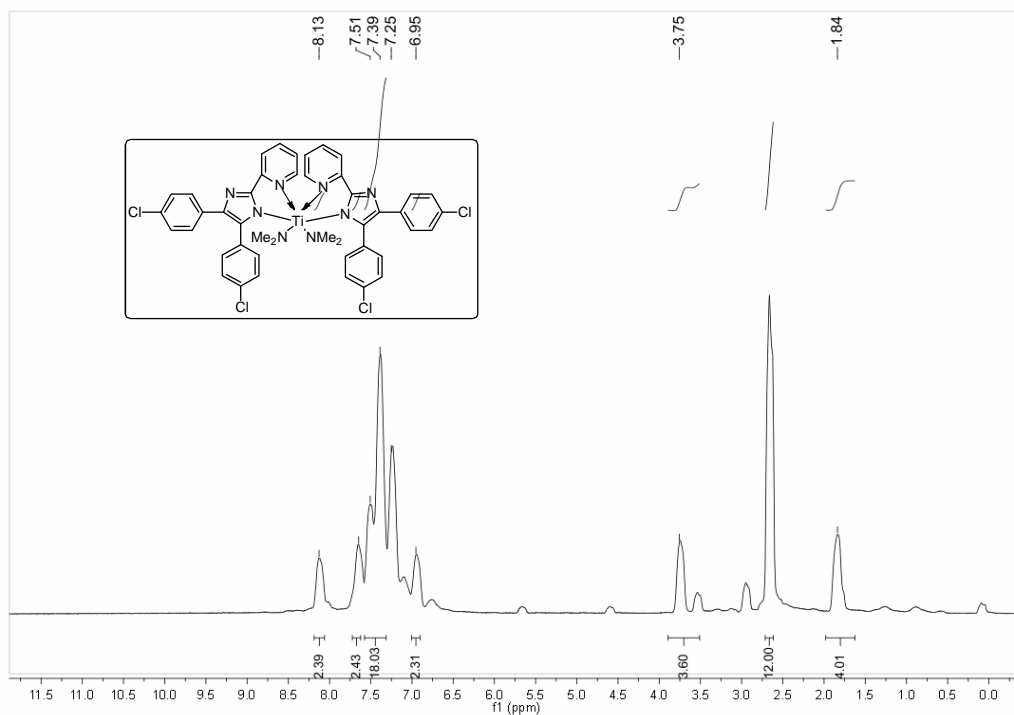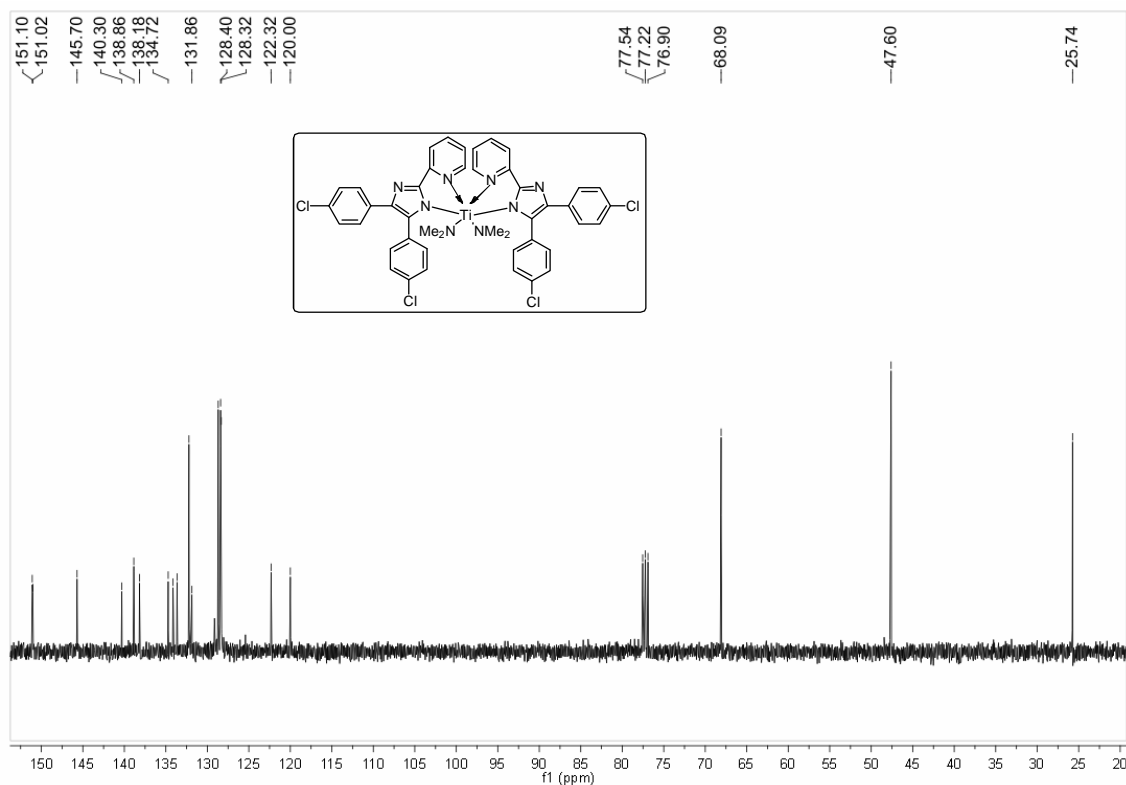

## 2.7 $^1\text{H}$ and $^{13}\text{C}$ NMR spectra for **7**·THF

$^1\text{H}$  NMR (400 MHz,  $\text{CDCl}_3$ )  $\delta$  8.02 (d, 2H), 7.50 (dd, 6H), 7.38–7.29 (m, 6H), 6.83 (d, 6H), 6.75 (d, 4H), 3.78 (s, 6H), 3.73 (s, 6H), 3.68 (s, 4H), 2.59 (s, 12H), 1.78 (s, 4H);  $^{13}\text{C}$  NMR (75 MHz,  $\text{CDCl}_3$ )  $\delta$  159.11, 158.01, 151.48, 150.36, 145.98, 140.77, 138.53, 132.28, 129.26, 129.00, 128.56, 121.71, 119.66, 113.68, 113.42, 68.21, 55.52, 55.42, 47.58, 25.84.

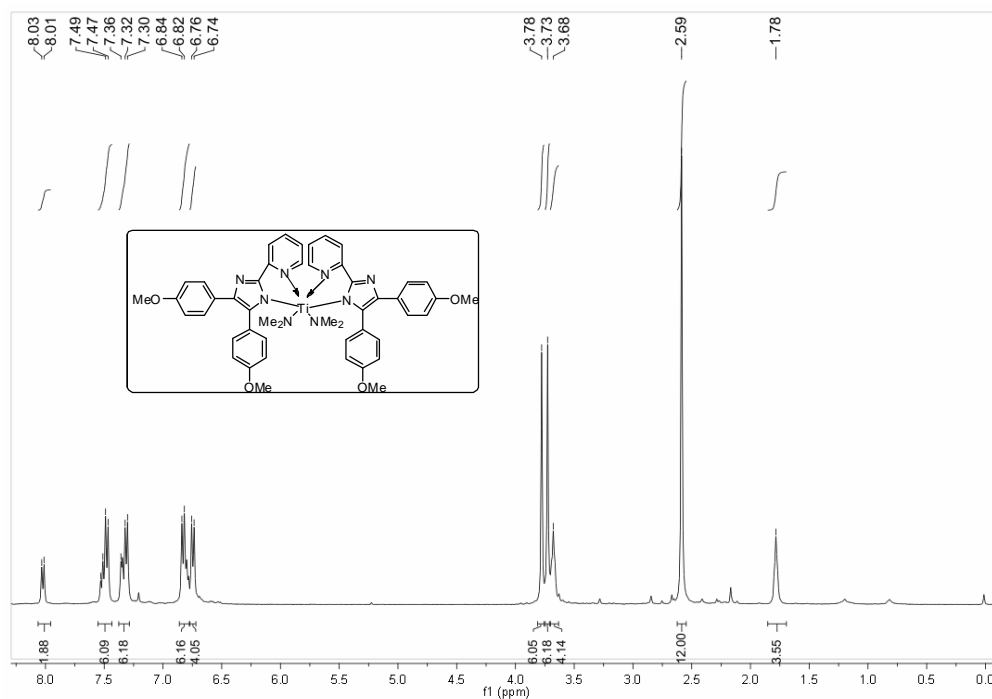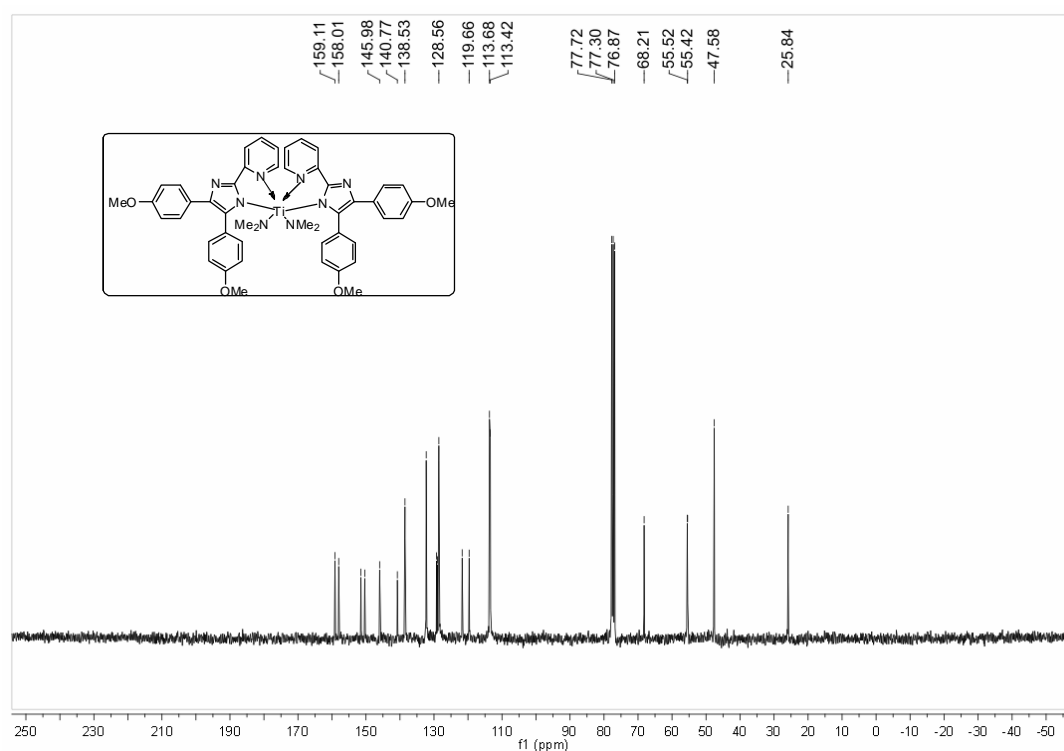

## 2.8 $^1\text{H}$ and $^{13}\text{C}$ NMR spectra for **8**

**$^1\text{H}$  NMR (400 MHz,  $\text{CDCl}_3$ )**  $\delta$  8.05 (d, 2H), 7.63–7.51 (m, 6H), 7.18 (t, 8H), 6.90 (d, 4H), 6.75 (t, 4H), 3.42 (d, 12H), 2.65 (s, 12H);  **$^{13}\text{C}$  NMR (100 MHz,  $\text{CDCl}_3$ )**  $\delta$  151.19, 150.36, 140.14, 133.67, 131.42, 126.04, 124.75, 122.46, 121.66, 121.47, 120.89, 120.26, 120.01, 118.73, 114.33, 113.60, 112.63, 112.37, 104.29, 103.50, 48.37, 48.16, 40.78.

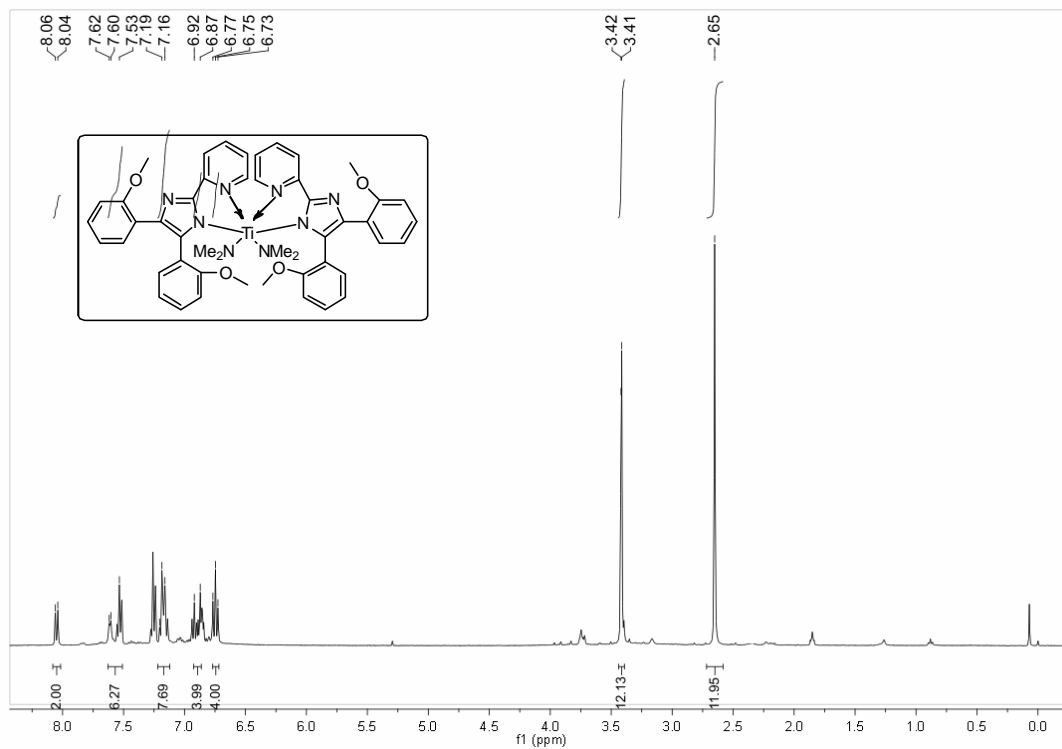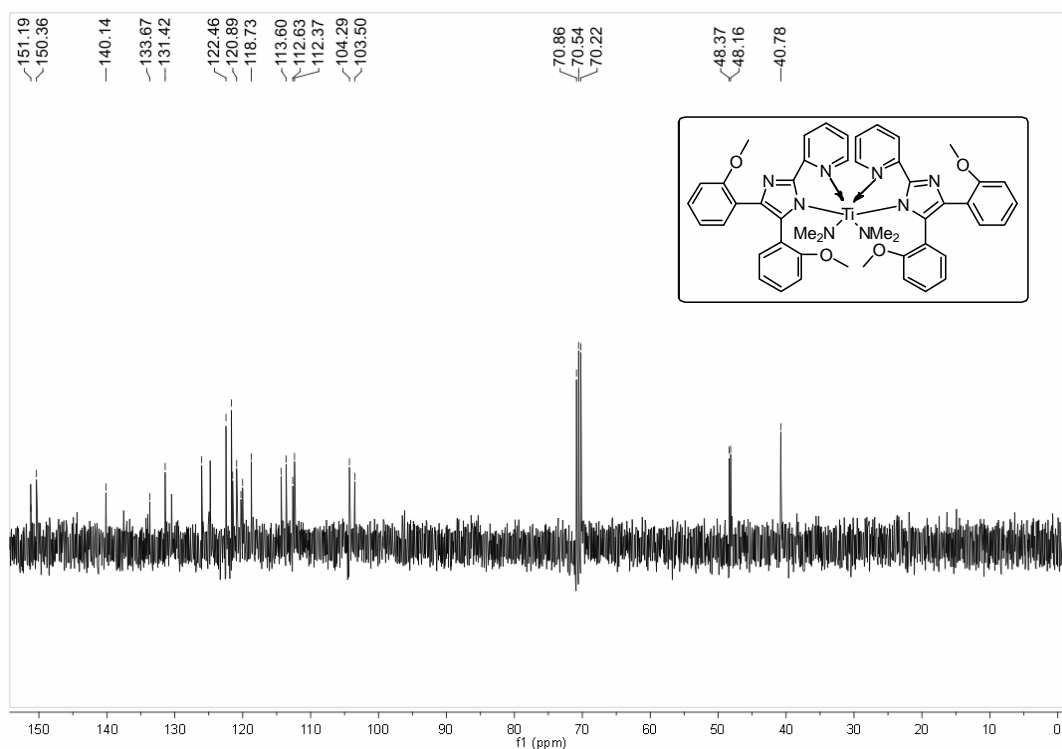

## 2.9 $^1\text{H}$ and $^{13}\text{C}$ NMR spectra for **9**

$^1\text{H}$  NMR (300 MHz,  $\text{CDCl}_3$ )  $\delta$  8.15 (d, 1H), 7.58 (d, 4H), 7.33 (s, 6H), 7.14 (d, 2H), 6.93 (d, 1H), 3.71 (s, 4H), 2.32 (s, 18H), 1.82 (s, 4H).

$^{13}\text{C}$  NMR (75 MHz,  $\text{CDCl}_3$ )  $\delta$  152.11, 151.78, 139.52, 139.19, 135.98, 130.62, 128.26, 128.14, 127.53, 126.18, 122.23, 120.33, 68.81, 41.45, 25.66.

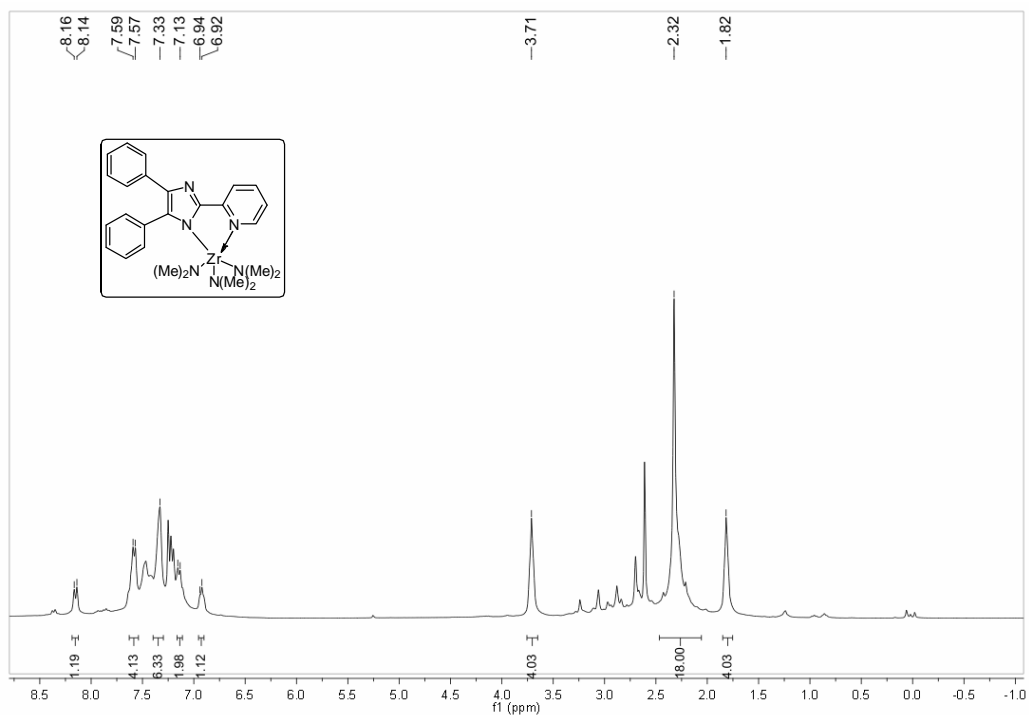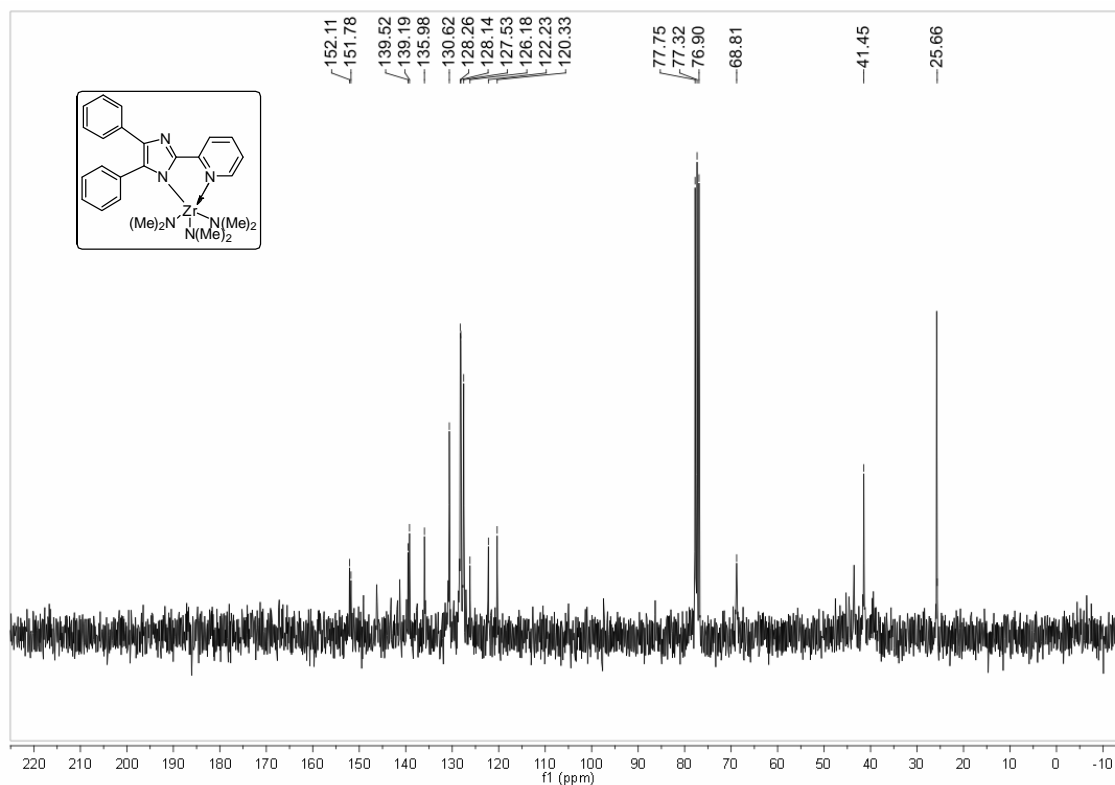

## 2.10 $^1\text{H}$ and $^{13}\text{C}$ NMR spectra for **10**·1.5THF

$^1\text{H}$  NMR (300 MHz,  $\text{CDCl}_3$ )  $\delta$  8.17 (d, 2H), 7.60 (d, 7H), 7.49 (s, 6H), 7.35 (s, 7H), 7.17 (d, 3H), 6.94 (s, 3H), 3.74 (s, 6H), 2.34 (s, 12H), 1.84 (s, 6H);  $^{13}\text{C}$  NMR (75 MHz,  $\text{CDCl}_3$ )  $\delta$  150.79, 150.47, 144.96, 140.00, 138.21, 137.85, 134.66, 134.49, 129.31, 126.96, 126.82, 126.22, 124.88, 120.91, 119.02, 103.64, 66.88, 40.12, 24.51.

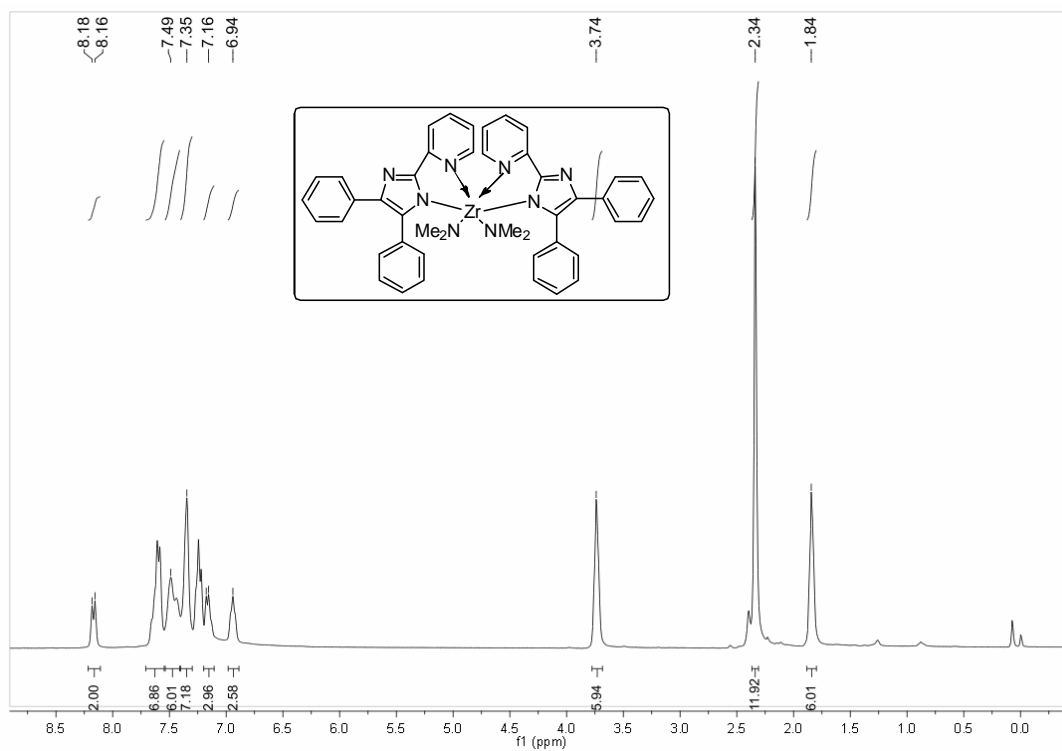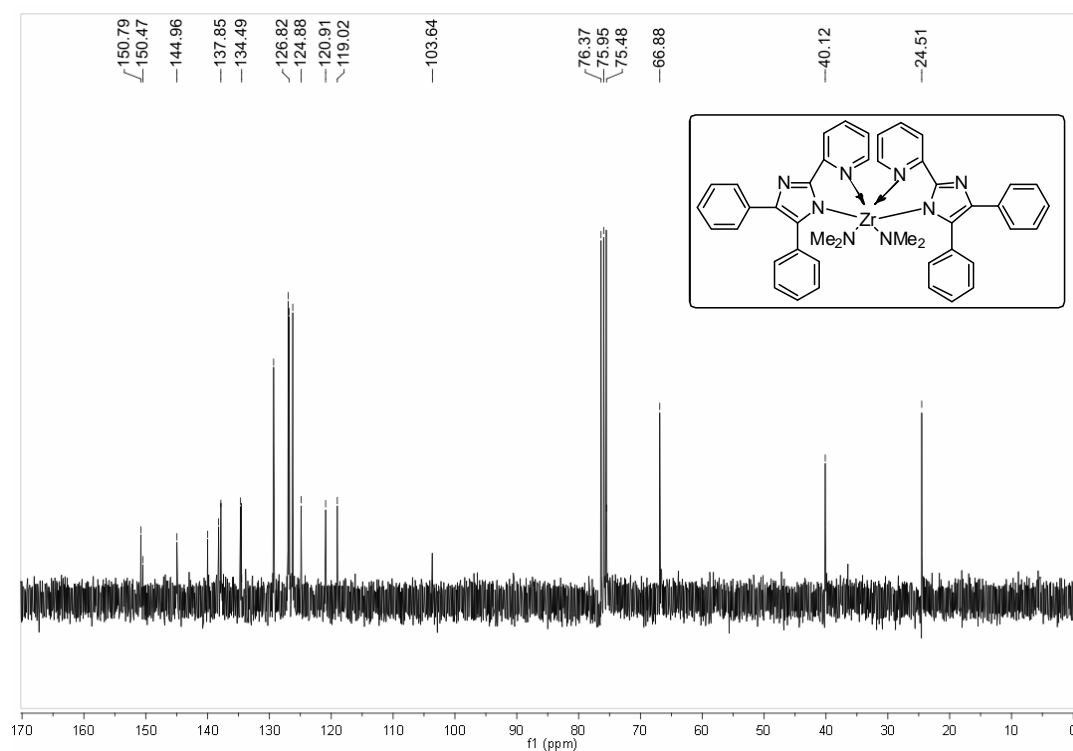

## 2.11 $^1\text{H}$ and $^{13}\text{C}$ NMR spectra for **11**·0.5THF

$^1\text{H}$  NMR (400 MHz,  $\text{CDCl}_3$ )  $\delta$  8.10 (d, 2H), 7.61 (s, 3H), 7.42 (m, 10H), 7.16 (d, 6H), 6.91 (s, 3H), 3.67 (s, 3H), 2.31 (s, 12H), 1.77 (s, 3H);  $^{13}\text{C}$  NMR (100 MHz,  $\text{CDCl}_3$ )  $\delta$  154.09, 153.90, 148.13, 142.65, 141.53, 140.23, 136.17, 136.10, 135.79, 134.15, 133.82, 130.86, 130.57, 130.47, 124.63, 122.60, 70.26, 43.65, 27.79

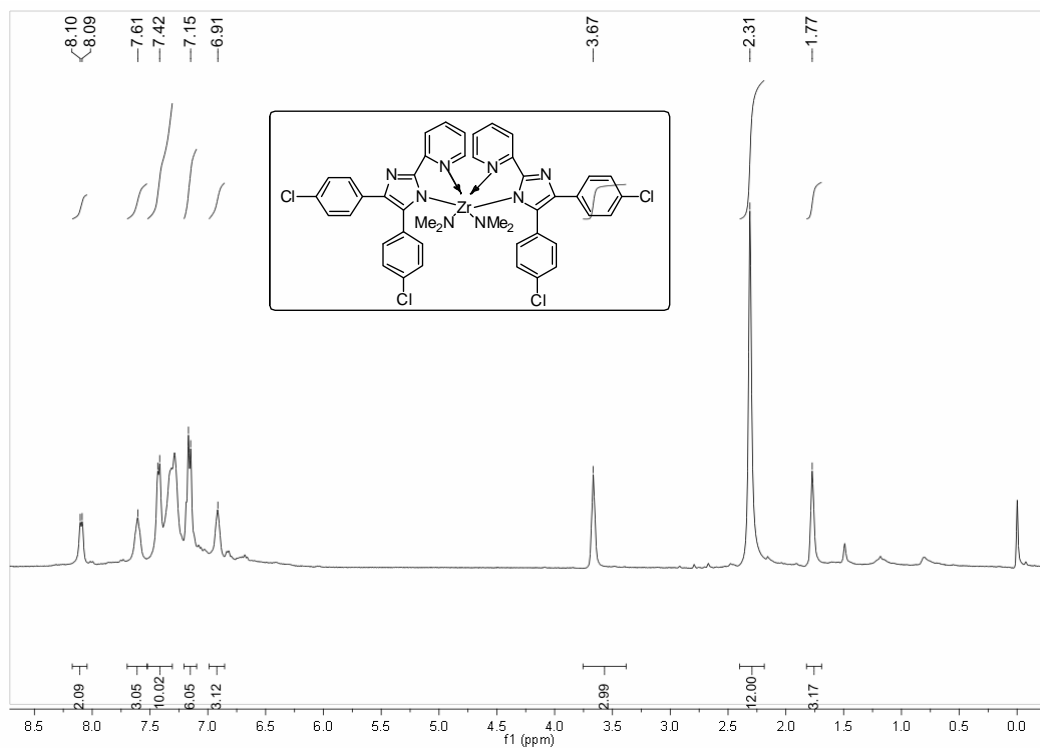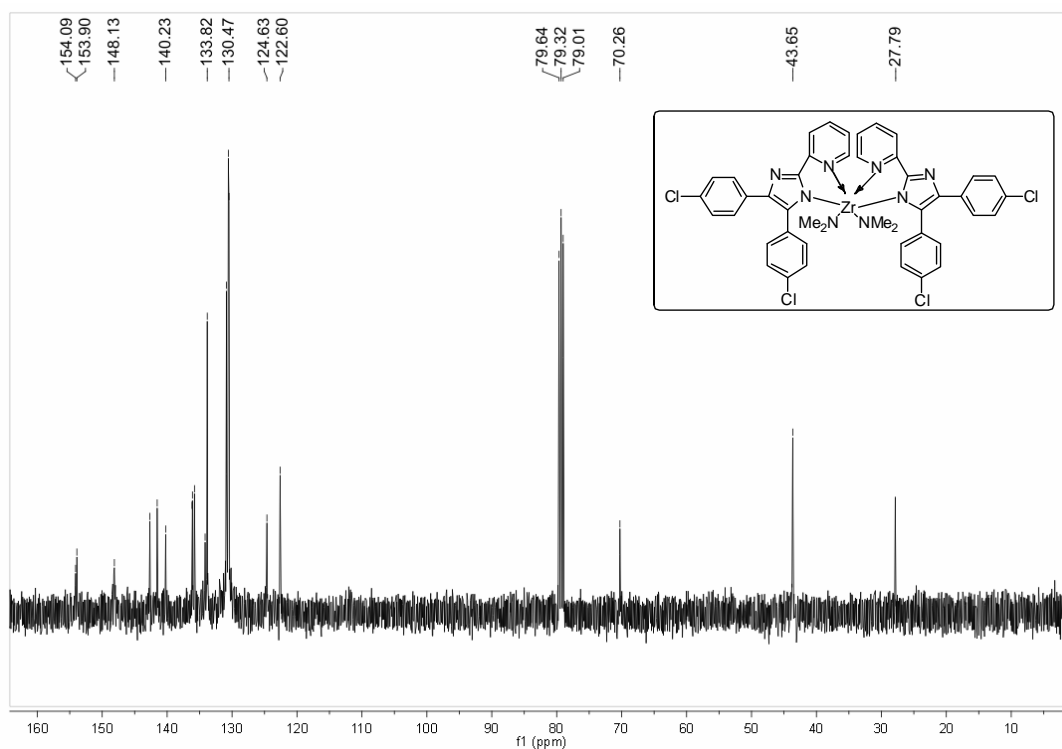

## 2.12 $^1\text{H}$ and $^{13}\text{C}$ NMR spectra for **12**·0.5THF

$^1\text{H}$  NMR (300 MHz,  $\text{CDCl}_3$ )  $\delta$  8.11 (d, 2H), 7.65–7.47 (m, 6H), 7.39 (s, 6H), 6.89 (s, 6H), 6.80 (s, 4H), 3.81 (s, 6H), 3.76 (s, 6H), 3.71 (s, 2H), 2.36 (s, 12H), 1.81 (s, 2H);

$^{13}\text{C}$  NMR (75 MHz,  $\text{CDCl}_3$ )  $\delta$  157.80, 156.81, 150.82, 144.93, 139.65, 137.75, 137.10, 130.43, 127.50, 127.30, 127.21, 120.59, 118.81, 112.38, 112.21, 66.86, 54.20, 54.07, 24.50

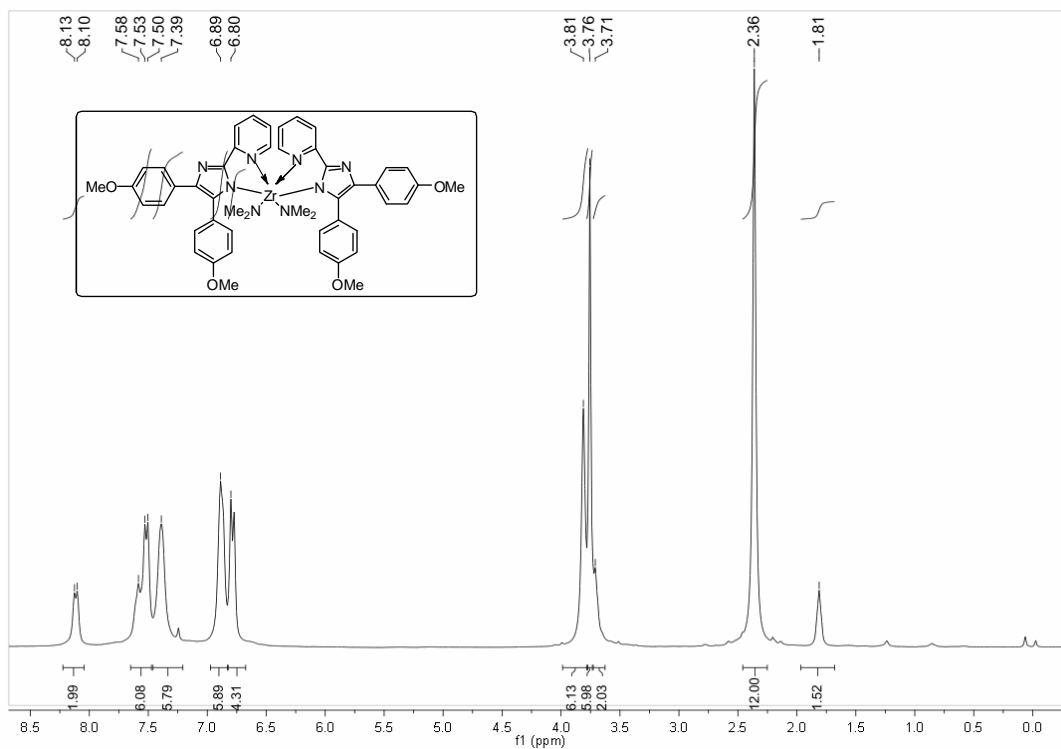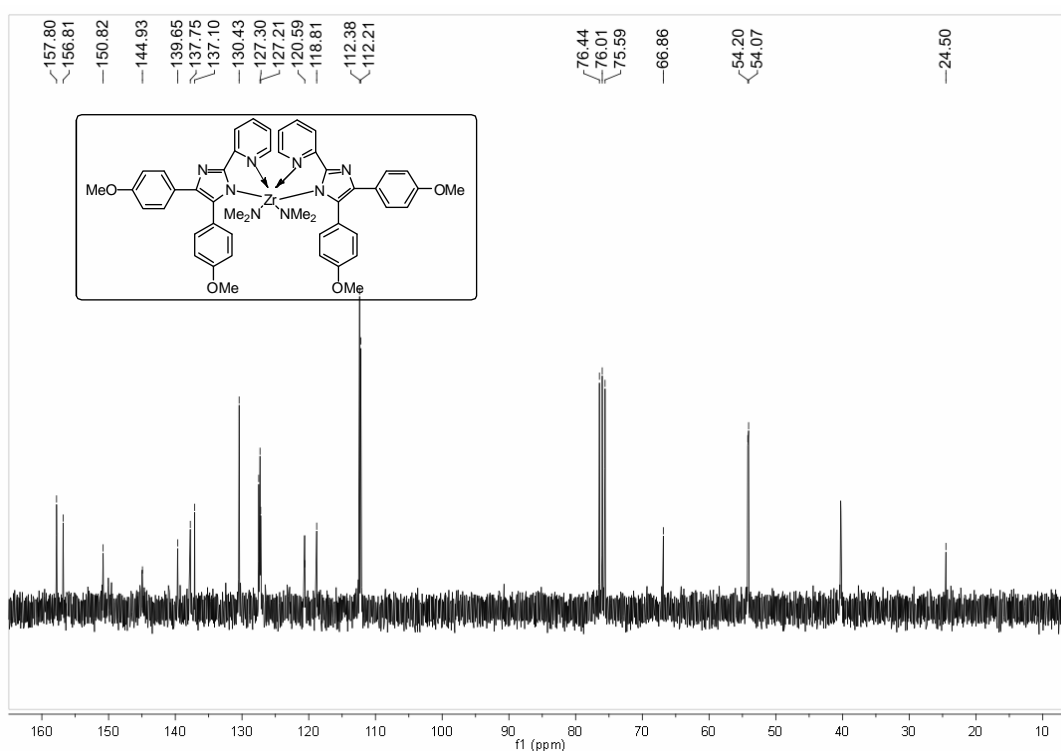

## 2.13 $^1\text{H}$ and $^{13}\text{C}$ NMR spectra for the ligand HL4

### 2.13 $^1\text{H}$ NMR spectrum for the HL4 ligand

$^1\text{H}$  NMR (400 MHz,  $\text{CDCl}_3$ )  $\delta$  11.57 (s, 1H), 8.43 (d, 1H), 8.26 (d, 1H), 7.69 (s, 1H), 7.57 (s, 1H), 7.28 (s, 4H), 7.11 (d, 1H), 6.87 (m, 1H), 6.73 (m, 2H), 3.81 (s, 3H), 3.48 (s, 3H).

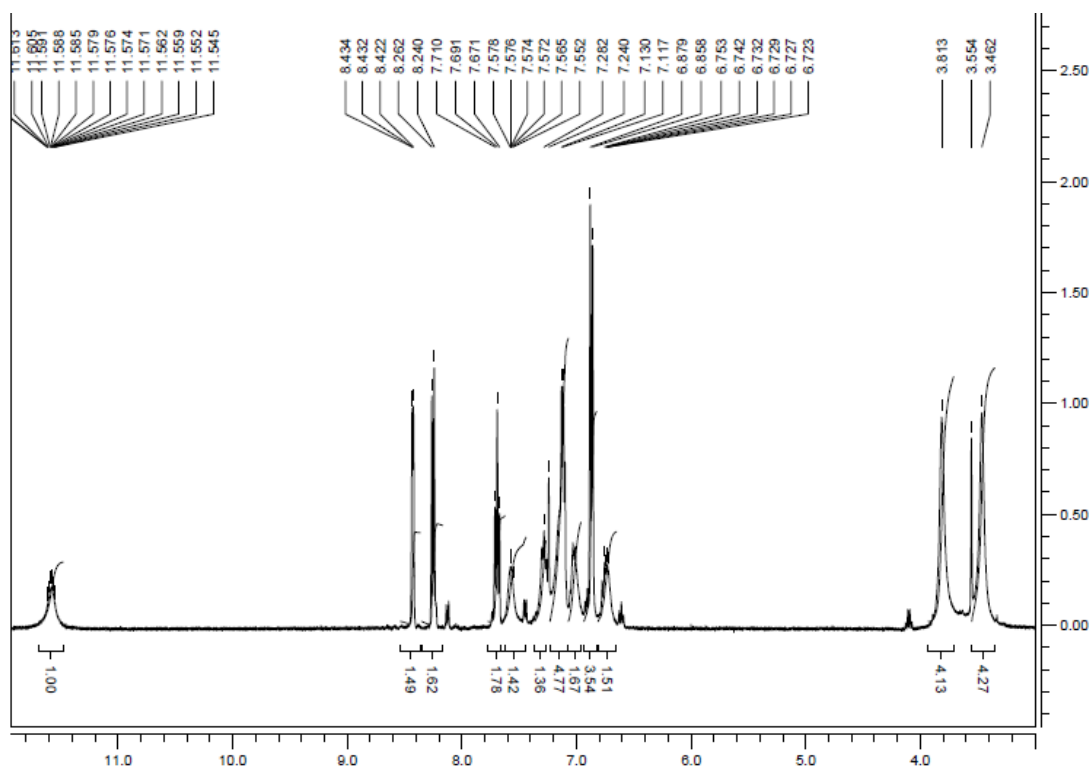



### 3. $^1\text{H}$ and $^{13}\text{C}$ NMR spectra, IR and HRMS data for the hydroamination products.

#### 3.1 N-(1-Phenylethyl) aniline

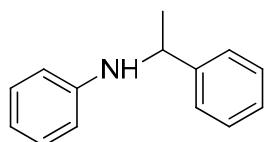

Colorless oil.  $^1\text{H}$  NMR (400 MHz,  $\text{CDCl}_3$ ):  $\delta$  = 7.36 (d, 2H, Ar-H), 7.30 (t, 2H, Ar-H), 7.21 (d, 1H, Ar-H), 7.08 (t, 2H, Ar-H), 6.63 (t, 1H, Ar-H), 6.50 (d, 2H, Ar-H), 4.47 (q, 1H, -NCH-), 4.02 (s, 1H, -NH), 1.50 (d, 3H, - $\text{CH}_3$ ).  $^{13}\text{C}$  NMR (100 MHz,  $\text{CDCl}_3$ ):  $\delta$  = 147.40, 145.37, 129.28, 128.82, 127.05, 126.02, 117.42, 113.48, 53.65, 25.23.

IR (KBr,  $\text{cm}^{-1}$ ): 3411, 3052, 3022, 2965, 2923, 2866, 2572, 1601, 1504, 1449, 1372, 1317, 1257, 1179, 1139, 1076, 868, 748, 700, 608, 545, 510.

HRMS Calcd. for  $\text{C}_{14}\text{H}_{15}\text{N}$ : 197.1204. Found: 197.1204

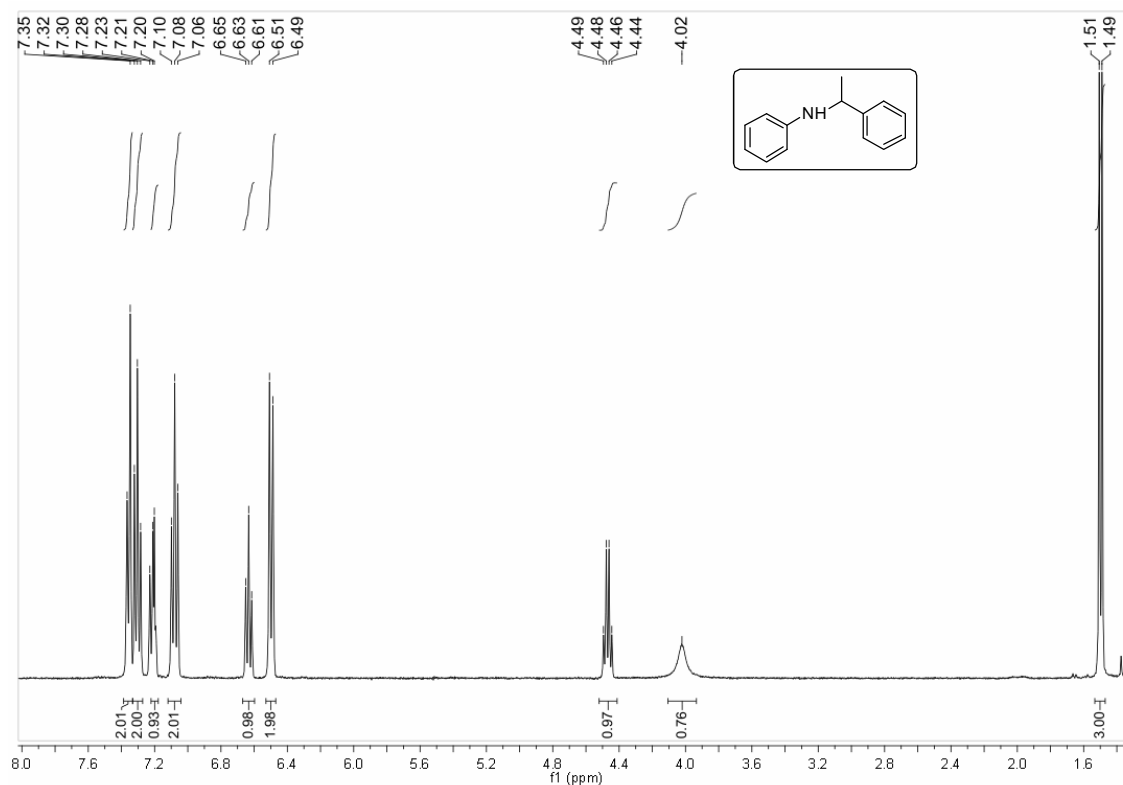

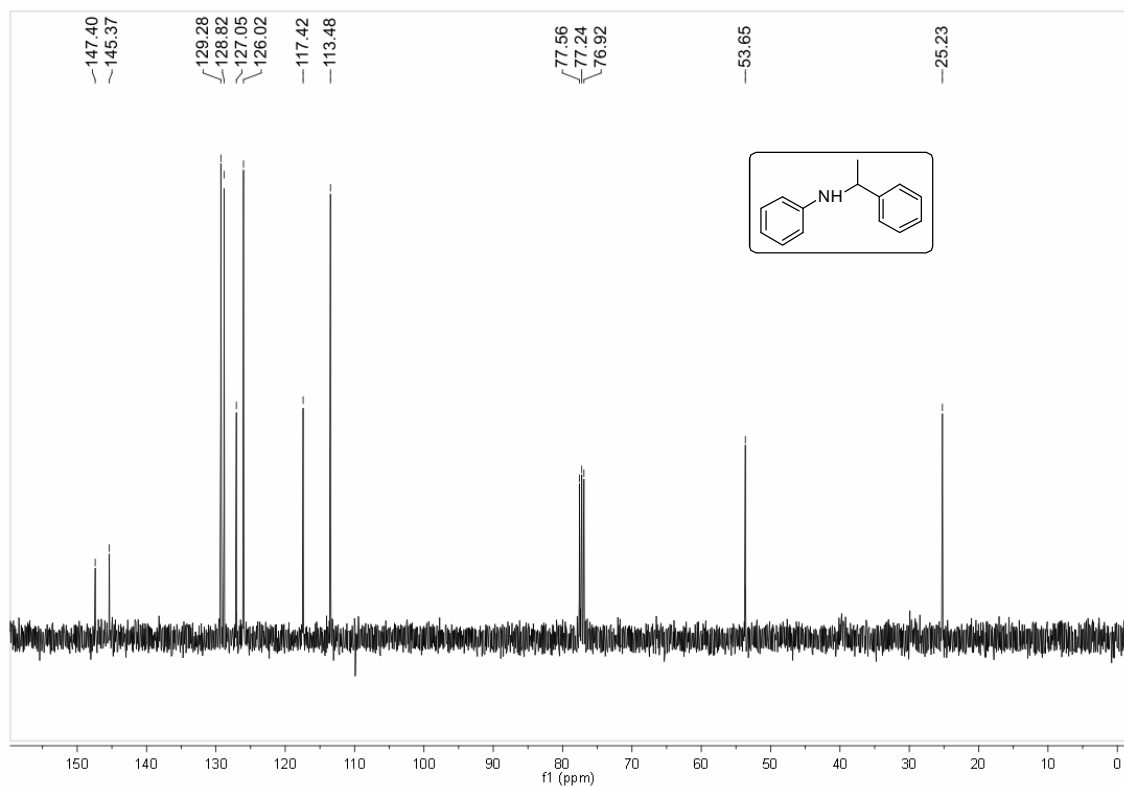

### 3.2 N-(Hexan-3-yl)aniline

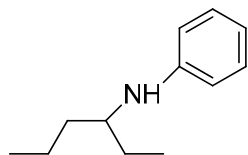

Light yellow oil.  $^1\text{H NMR}$  (400 MHz,  $\text{CDCl}_3$ ):  $\delta$  = 7.14 (t, 2H, Ar-H), 6.63 (t, H, Ar-H), 6.56 (d, 2H, Ar-H), 3.42 (s, 1H, -NH), 3.28 (q, 1H, -NCH-), 1.48-1.35 (tdd, 6H, - $\text{CH}_2$ -), 0.91 (dd, 6H, - $\text{CH}_3$ ).  $^{13}\text{C NMR}$  (100 MHz,  $\text{CDCl}_3$ ):  $\delta$  = 148.35, 129.43, 116.65, 113.04, 53.97, 36.86, 27.43, 19.37, 14.43, 10.24.

IR(KBr,  $\text{cm}^{-1}$ ): 3406, 3084, 3052, 3019, 2959, 2931, 2872, 2571, 1912, 1602, 1505, 1462, 1428, 1380, 1320, 1274, 1154, 1032, 865, 746, 691, 507.

HRMS Calcd. for  $\text{C}_{12}\text{H}_{19}\text{N}$ : 177.1517. Found: 177.1514

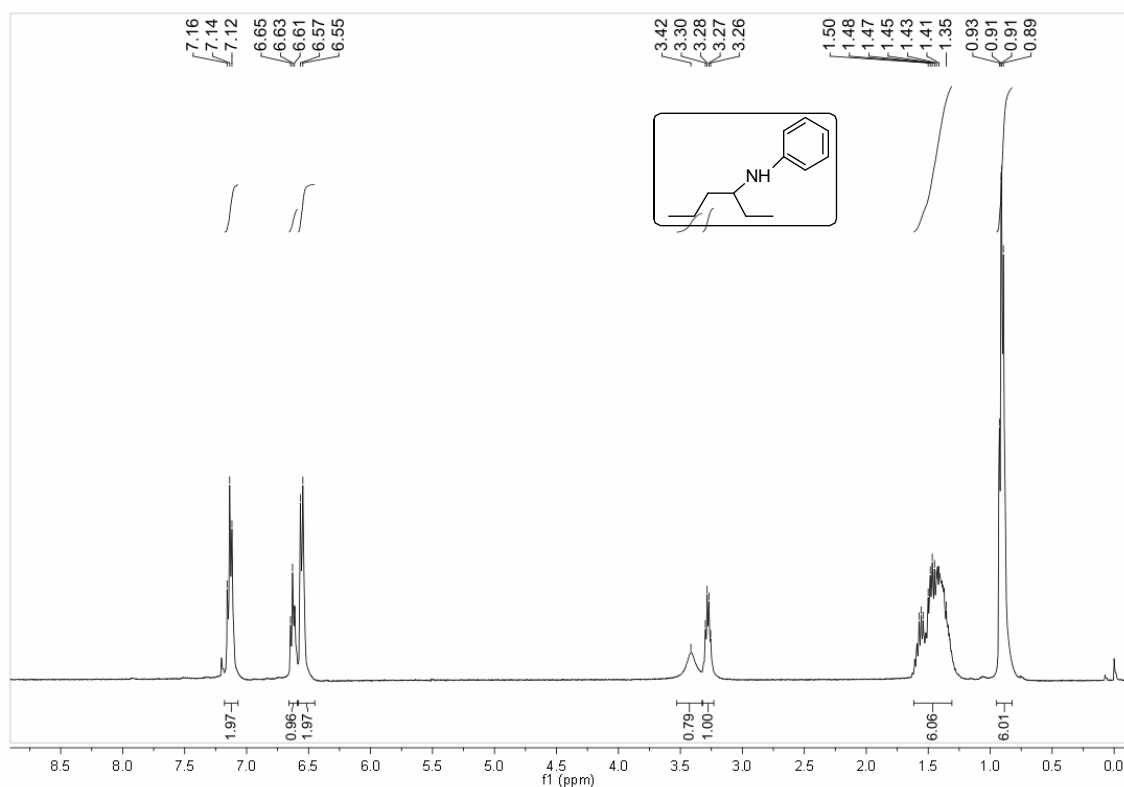

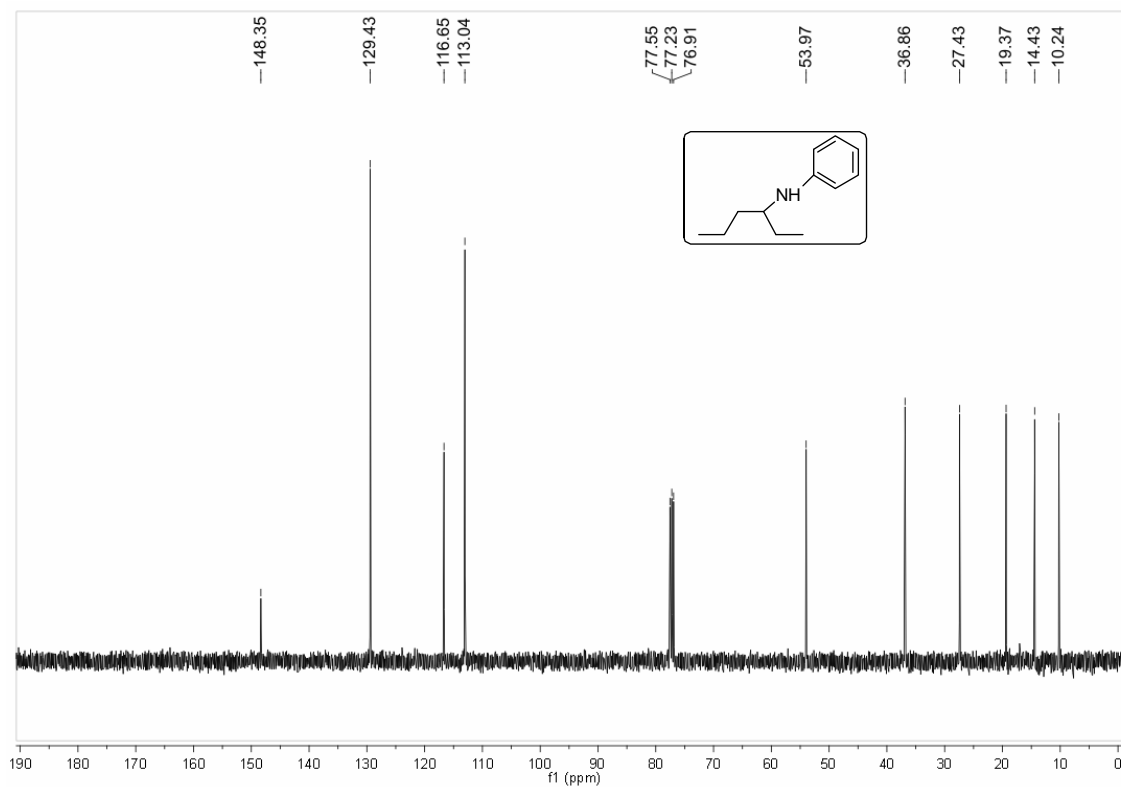

### 3.3 N-(1,2-Diphenylethyl)aniline

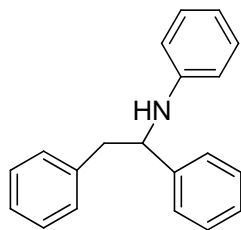

Colorless oil.  $^1\text{H NMR}$  (400 MHz,  $\text{CDCl}_3$ ):  $\delta$  = 7.30 (t, 4H, Ar-H), 7.27–7.17 (m, 4H, Ar-H), 7.11 (d, 2H, Ar-H), 7.03 (t, 2H, Ar-H), 6.61 (t, 1H, Ar-H), 6.44 (d, 2H, Ar-H), 4.57 (t, 1H, -NCH-), 4.11 (s, 1H, -NH), 3.12 (dd, 1H, - $\text{CH}_2$ -), 2.99 (dd, 1H, - $\text{CH}_2$ -).  $^{13}\text{C NMR}$  (100MHz,  $\text{CDCl}_3$ ):  $\delta$  = 147.44, 143.60, 137.85, 129.39, 129.21, 128.77, 128.73, 127.25, 126.91, 126.62, 117.65, 113.80, 59.37, 45.36.

IR (KBr,  $\text{cm}^{-1}$ ): 3410, 3024, 2931, 2907, 2849, 1608, 1504, 1427, 1398, 1319, 1182, 1079, 1028, 868, 749, 697, 584, 514.

HRMS Calcd. for  $\text{C}_{20}\text{H}_{19}\text{N}$ : 273.1517. Found:273.1521

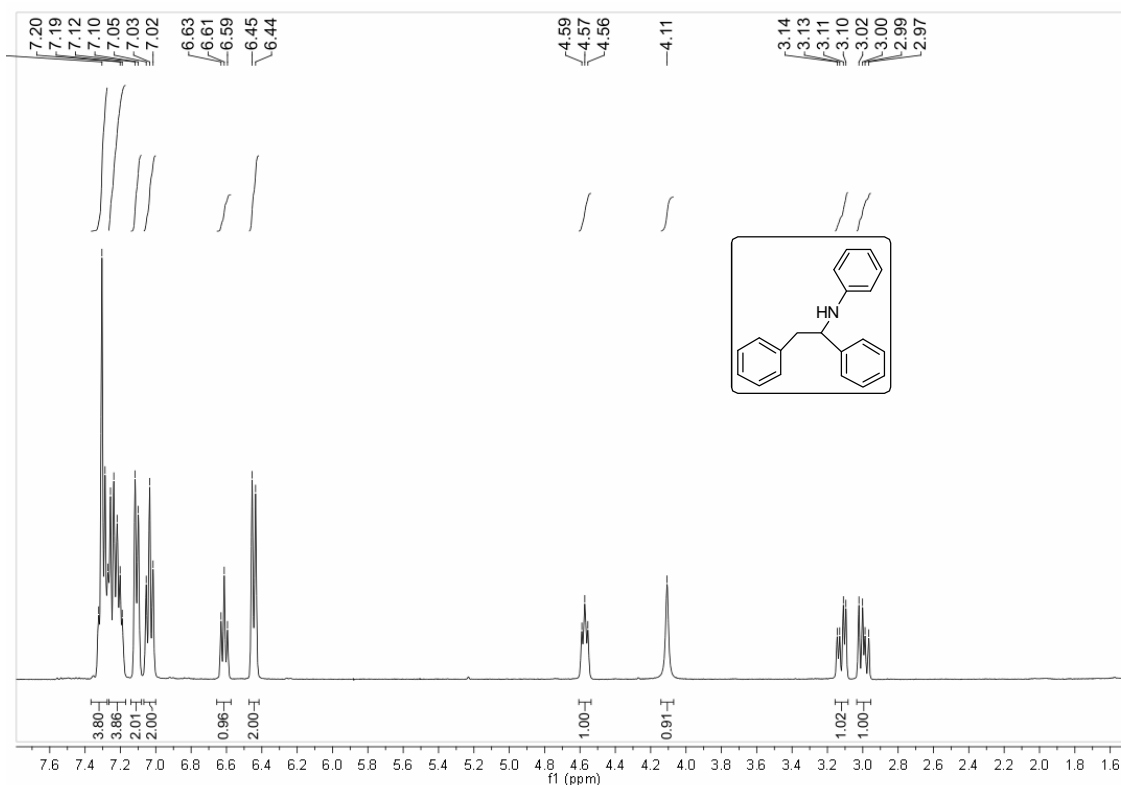

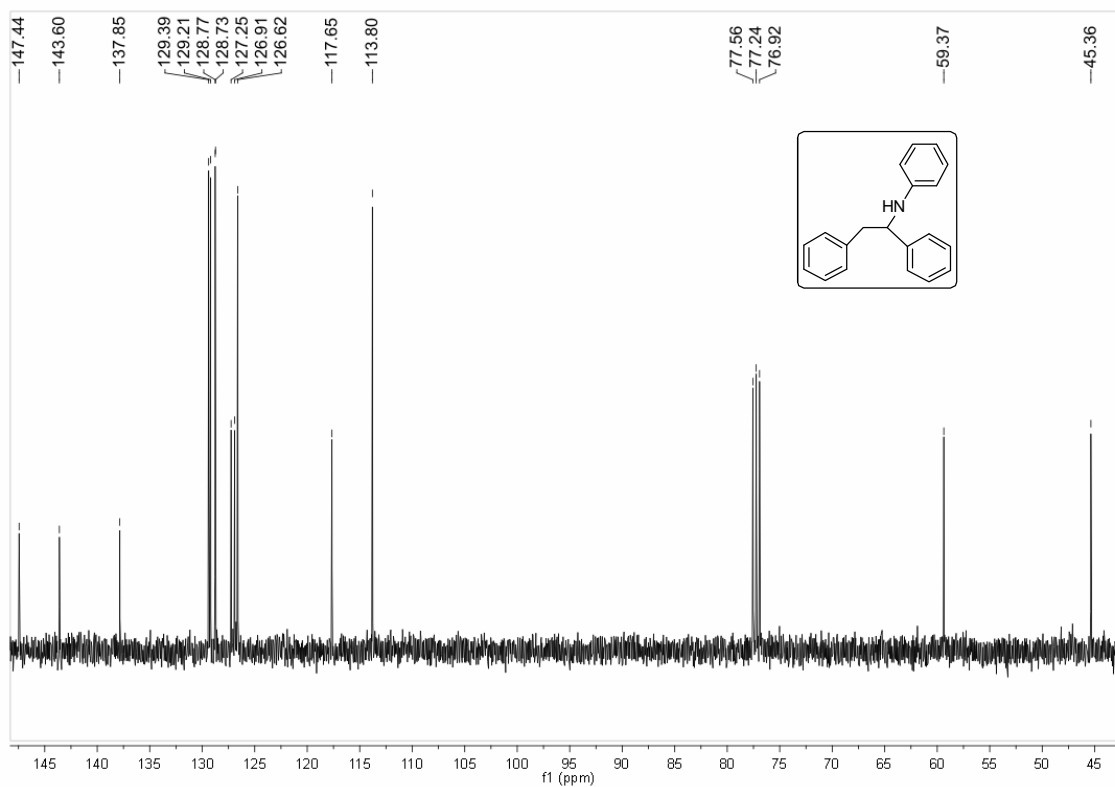

### 3. 4 N-(2-Octyl)aniline

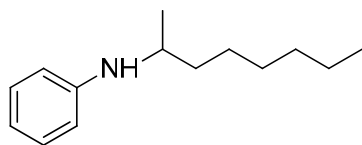

Light yellow oil.  $^1\text{H NMR}$  (400 MHz,  $\text{CDCl}_3$ ):  $\delta$  = 7.16 (t, 2H, Ar-H), 6.65 (t, 1H, Ar-H), 6.57 (d, 2H, Ar-H), 3.44 (dd, 2H, -NCH- and -NH), 1.54-1.28 (m, 10H,  $-(\text{CH}_2)_5-$ ), 1.16 (d, 3H,  $\text{CH}_3$ ), 0.88 (t, 3H,  $\text{CH}_3$ ).  $^{13}\text{C NMR}$  (100 MHz,  $\text{CDCl}_3$ ):  $\delta$  = 147.81, 129.40, 116.85, 113.18, 48.58, 37.36, 32.01, 29.53, 26.29, 22.79, 20.91, 14.26.

IR (KBr,  $\text{cm}^{-1}$ ): 3410, 3085, 3052, 3019, 2957, 2927, 2855, 2389, 2284, 1913, 1602, 1505, 1319, 1030, 993, 865, 746, 691, 507.

HRMS Calcd. for  $\text{C}_{14}\text{H}_{23}\text{N}$ : 205.1830. Found: 205.1830

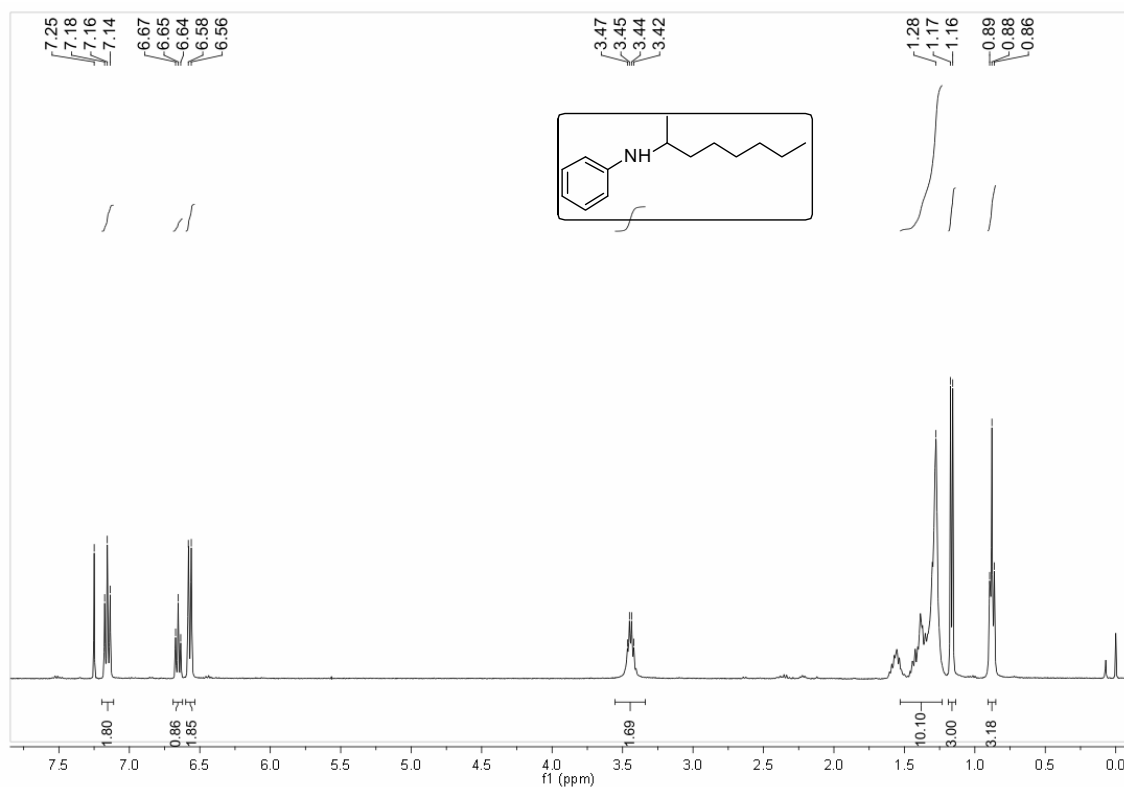

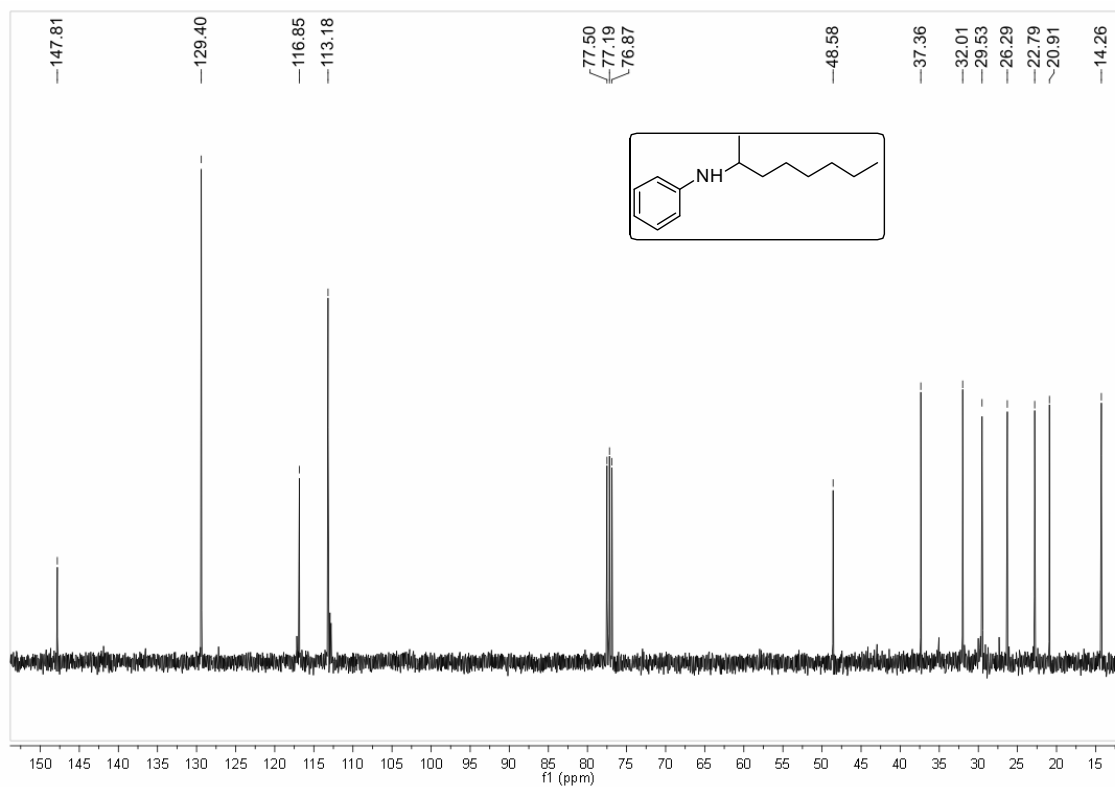



### 3.5 4-bromo-N-(octan-2-yl)aniline

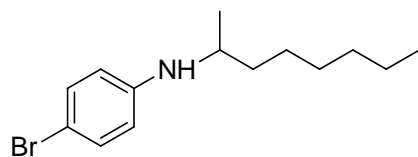

Colorless oil.  $^1\text{H NMR}$  (400 MHz,  $\text{CDCl}_3$ ):  $\delta$  = 7.21 (d, 2H, Ar-H), 6.43 (d, 2H, Ar-H), 3.45 (s, 1H, -NH-), 3.38 (dd, 1H, -NCH-), 1.55-1.29 (m, 10H,  $-(\text{CH}_2)_5-$ ), 1.14 (d, 3H,  $-\text{CH}_3$ ), 0.88 (t, 3H,  $-\text{CH}_3$ ).  $^{13}\text{C NMR}$  (100 MHz,  $\text{CDCl}_3$ ):  $\delta$  = 146.79, 132.04, 129.40, 114.69, 48.70, 37.18, 31.97, 29.47, 26.21, 22.77, 20.74, 14.26.

IR (KBr,  $\text{cm}^{-1}$ ): 3410, 2923, 2855, 1594, 1500, 1465, 1398, 1257, 1178, 1158, 1114, 1074, 999, 968, 811, 747, 692, 646, 502.

HRMS Calcd. for  $\text{C}_{14}\text{H}_{22}\text{BrN}$ : 283.0936. Found: 283.0938

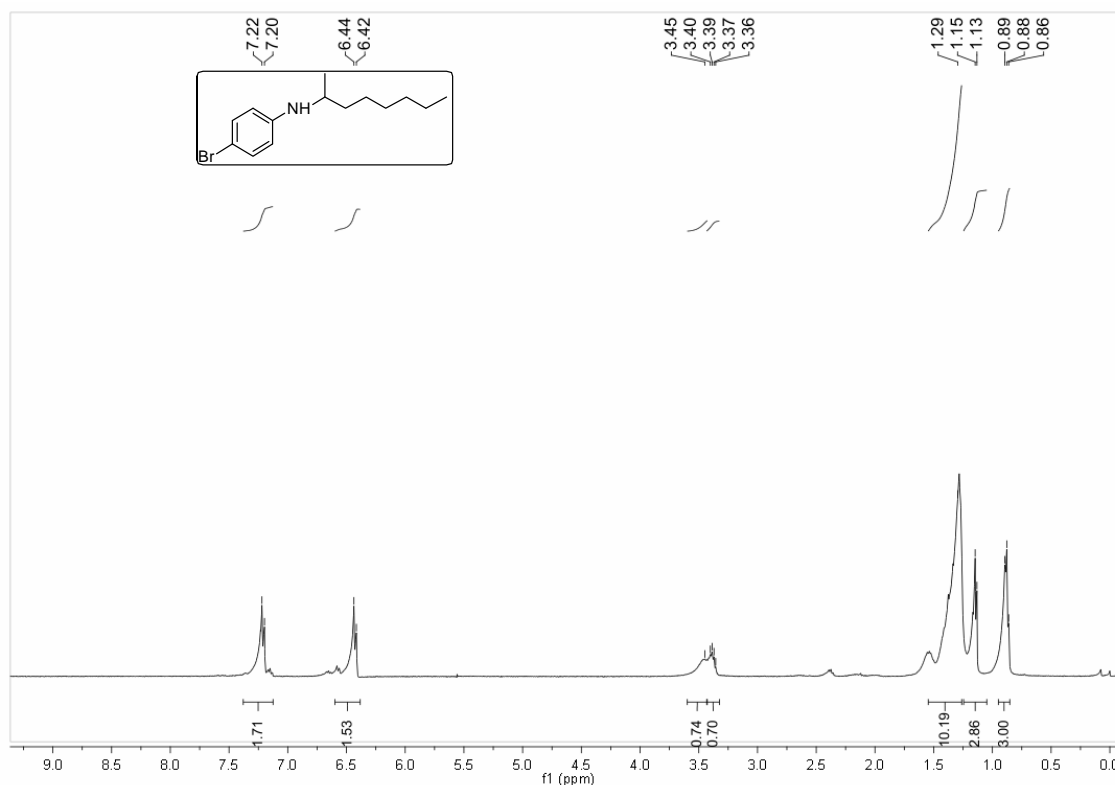

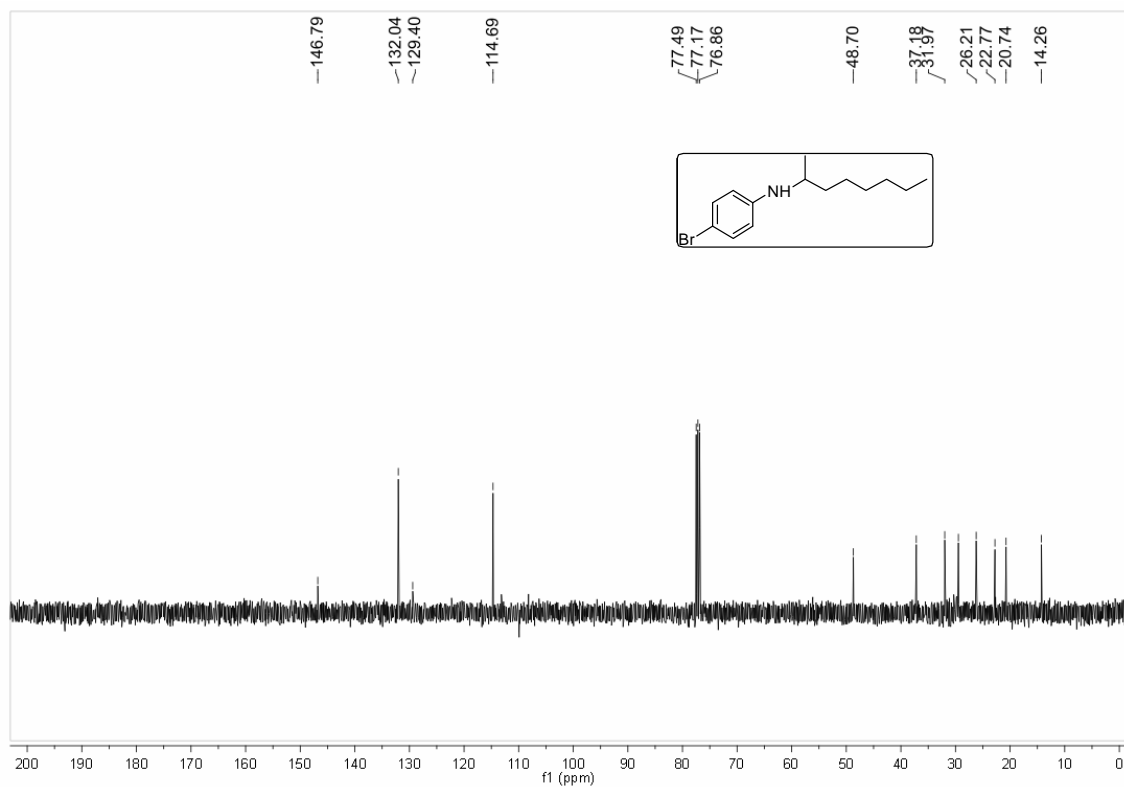

### 3.6 N-(2-Octyl)-2,4-dichloroaniline

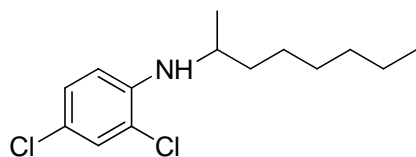

Colorless oil.  $^1\text{H NMR}$  (400 MHz,  $\text{CDCl}_3$ ):  $\delta$  = 7.23 (d, 1H, Ar-H), 7.07 (dd, 1H, Ar-H), 6.54 (d, 1H, Ar-H), 4.08 (s, 1H, -NH), 3.44 (s, 1H, -NCH), 1.66-1.40 (m, 2H, - $\text{CH}_2$ ), 1.37-1.25 (m, 8H, -( $\text{CH}_2$ ) $_4$ -), 1.19 (d, 3H, - $\text{CH}_3$ ), 0.88 (t, 3H, - $\text{CH}_3$ ).  $^{13}\text{C NMR}$  (100 MHz,  $\text{CDCl}_3$ ):  $\delta$  = 142.29, 128.86, 127.76, 120.32, 119.27, 112.08, 48.70, 37.00, 31.87, 29.39, 26.09, 22.72, 20.72, 14.20.

IR (KBr,  $\text{cm}^{-1}$ ): 3420, 3074, 2958, 2928, 2856, 2296, 1853, 1596, 1504, 1460, 1322, 1264, 1162, 1045, 866, 800, 751, 655, 550, 437.

HRMS Calcd. for  $\text{C}_{14}\text{H}_{21}\text{Cl}_2\text{N}$  : 273.1051. Found: 273.1049

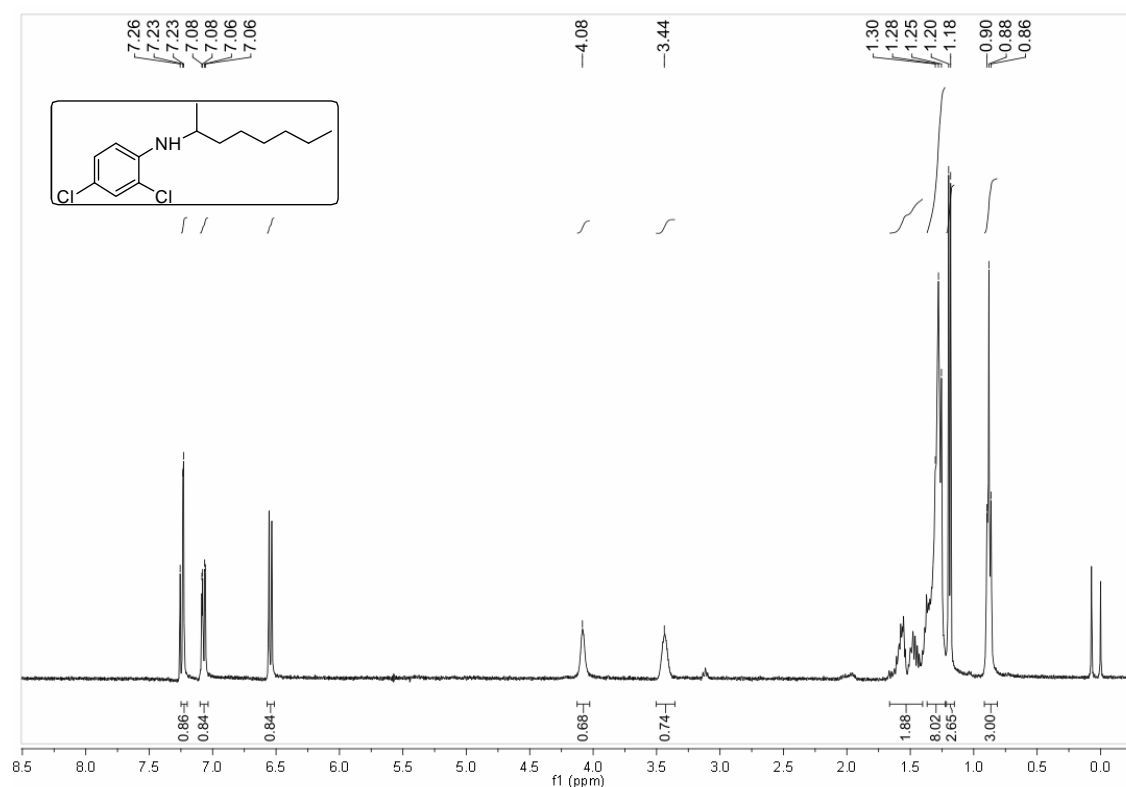

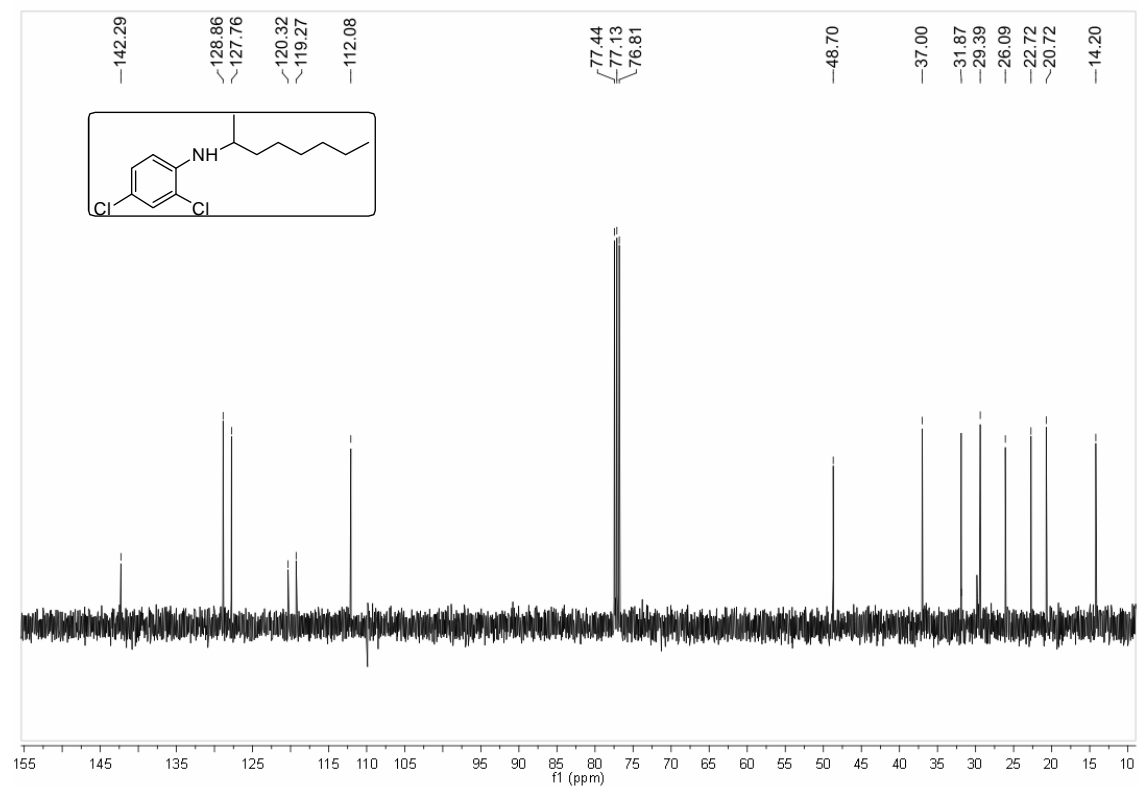

### 3.7 N-(2-Octyl)-4-methoxyaniline

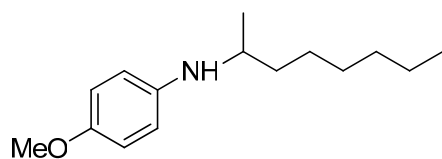

Light yellow oil. <sup>1</sup>H NMR (400 MHz, CDCl<sub>3</sub>): δ = 6.77 (d, 2H, Ar-H), 6.56 (d, 2H, Ar-H), 3.74 (s, 3H, -OCH<sub>3</sub>), 3.35 (dd, 1H, -NCH-), 3.27–2.83 (s, 1H, -NH), 1.55 (m, 2H, -CH<sub>2</sub>), 1.37–1.25 (d, 8H, -(CH<sub>2</sub>)<sub>4</sub>-), 1.14 (d, 3H, -CH<sub>3</sub>), 0.88 (t, 3H, -CH<sub>3</sub>). <sup>13</sup>C NMR (100 MHz, CDCl<sub>3</sub>): δ = 151.93, 141.86, 15.01, 114.89, 55.91, 49.73, 37.30, 31.97, 29.51, 26.27, 22.76, 20.81, 14.24.

IR(KBr, cm<sup>-1</sup>): 3397, 2928, 2855, 2074, 1843, 1618, 1513, 1465, 1376, 1234, 1179, 1041, 818, 757, 518.

HRMS Calcd. for C<sub>15</sub>H<sub>25</sub>NO: 235.1936. Found:235.1942.

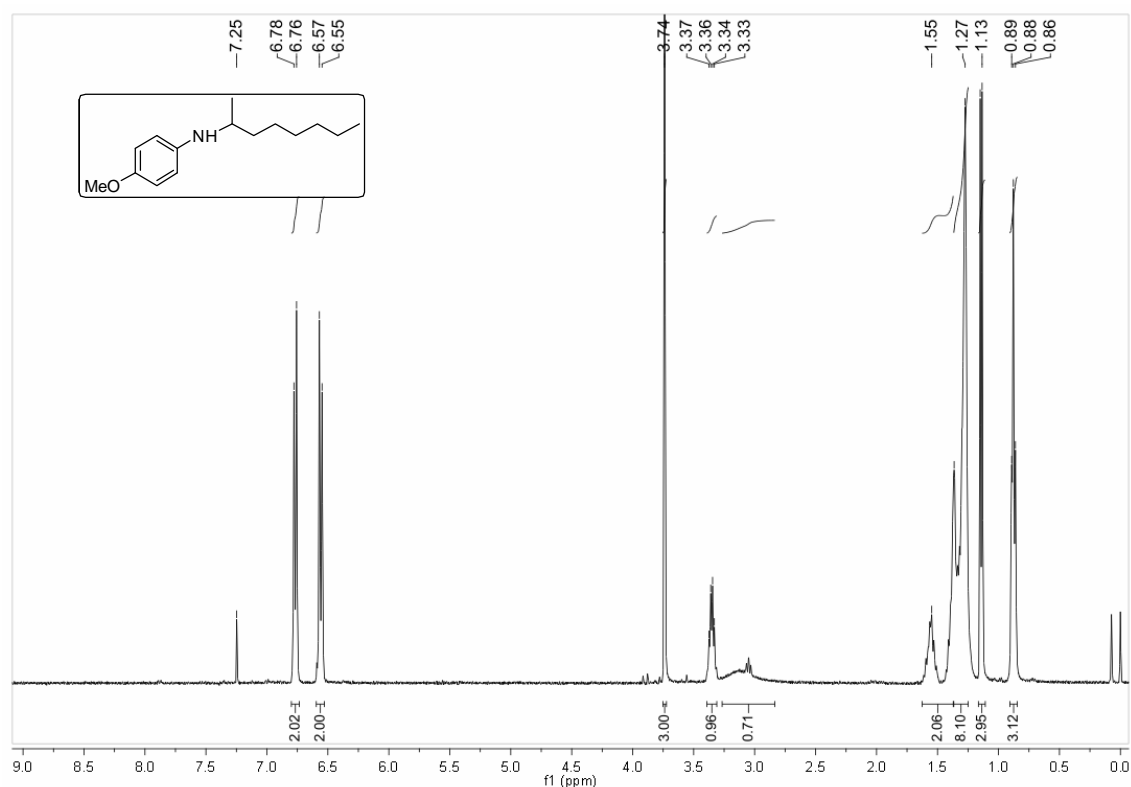

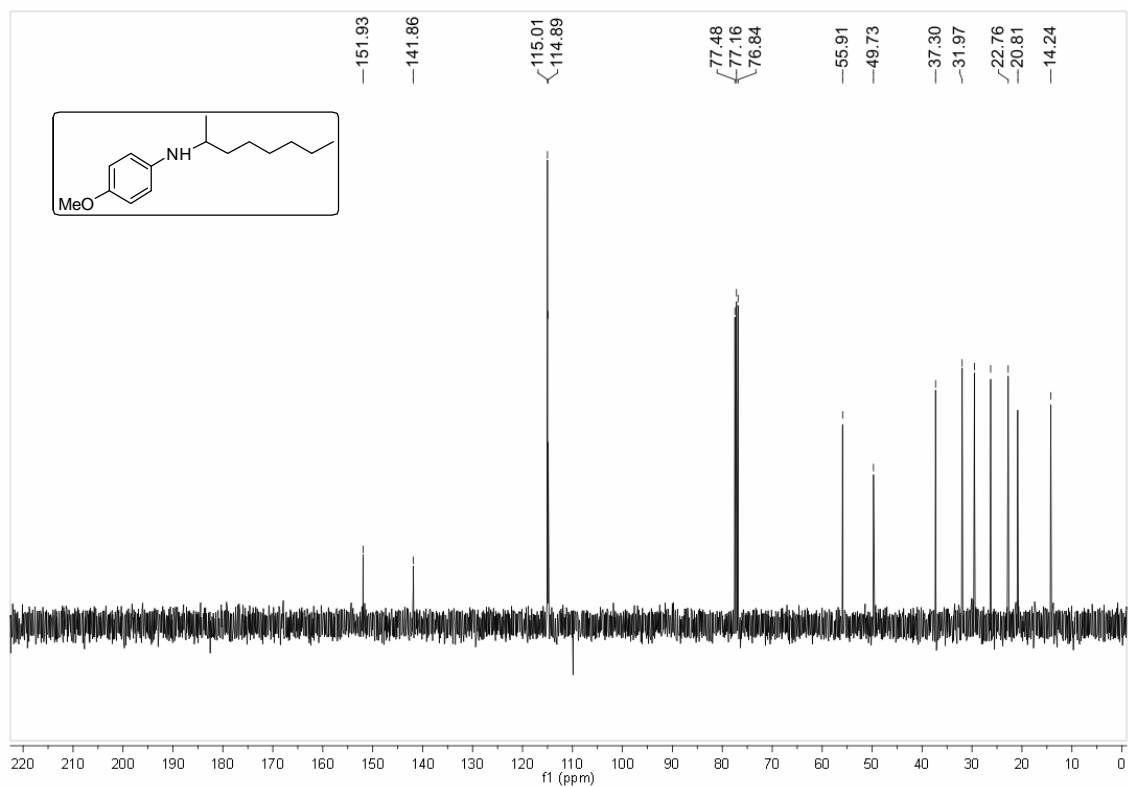

### 3. 8 N-(2-Octyl)naphthalen-2-amine

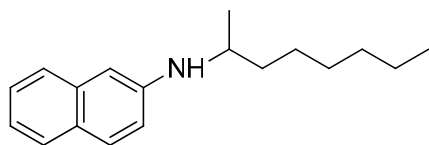

Light yellow oil.  $^1\text{H NMR}$  (400 MHz,  $\text{CDCl}_3$ ):  $\delta$  = 7.61 (d, 1H, Ar-H), 7.56 (d, 2H, Ar-H), 7.31 (t, 1H, Ar-H), 7.14 (t, 1H, Ar-H), 6.80 – 6.69 (m, 2H, Ar-H), 3.52 (dd, 2H, -NCH- and -NH), 1.43-1.26 (m, 10H,  $-(\text{CH}_2)_5-$ ), 1.17 (d, 3H,  $\text{CH}_3$ ), 0.87 (t, 3H,  $\text{CH}_3$ ).  $^{13}\text{C NMR}$  (100 MHz,  $\text{CDCl}_3$ ):  $\delta$  = 145.32, 135.45, 129.02, 127.73, 126.35, 125.90, 121.77, 118.40, 104.76, 48.62, 37.13, 31.99, 29.51, 26.25, 22.79, 20.67, 14.26.

IR (KBr,  $\text{cm}^{-1}$ ): 3407, 3051, 2957, 2931, 2855, 1901, 1629, 1603, 1522, 1484, 1398, 1263, 1224, 1189, 1145, 1018, 827, 743, 622, 470.

HRMS Calcd. for  $\text{C}_{18}\text{H}_{25}\text{N}$ : 255.1987. Found: 255.1985

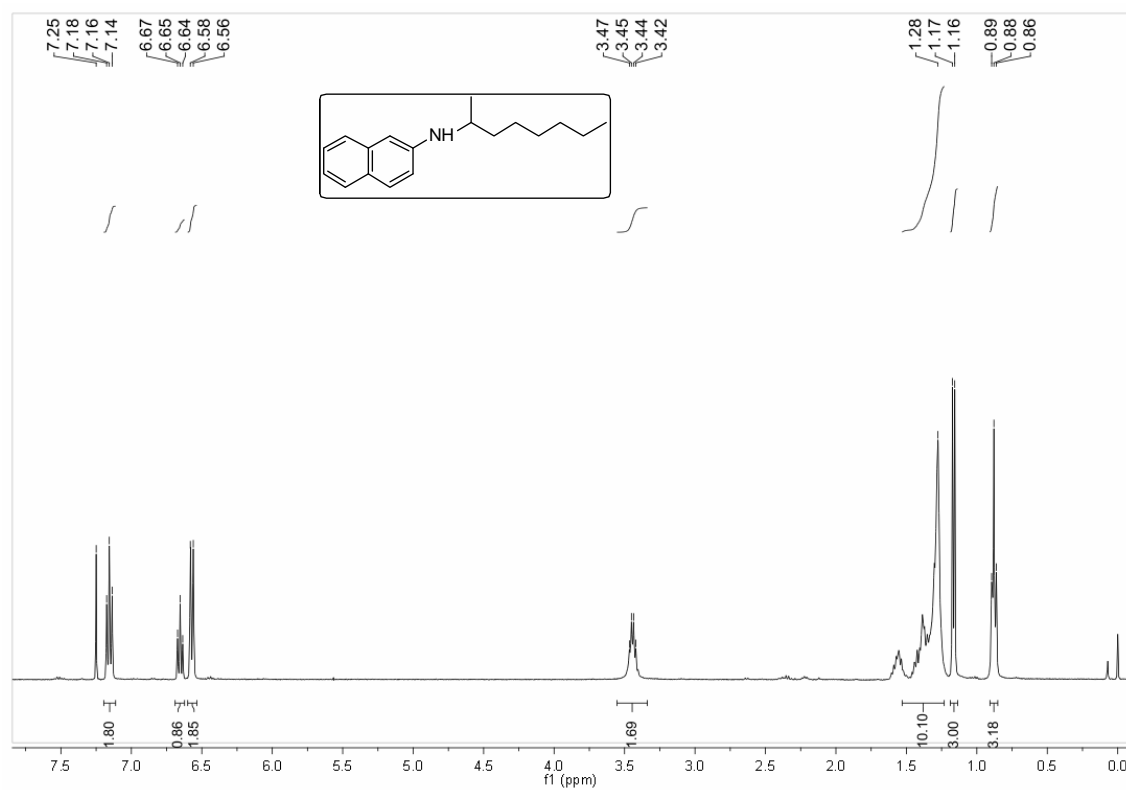

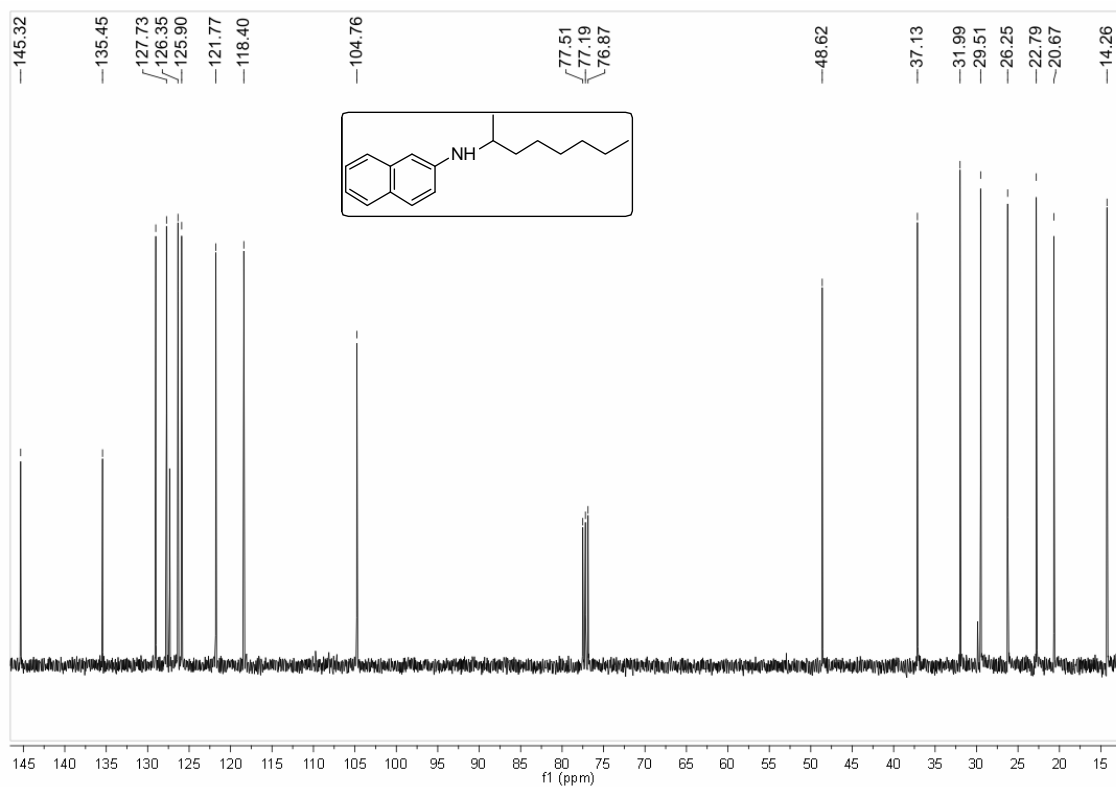



### 3.9 N-(2-Octyl)-2-fluoroaniline

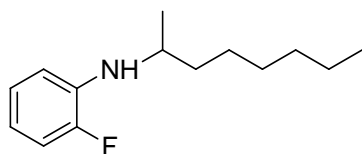

Colorless oil.  $^1\text{H NMR}$  (400 MHz,  $\text{CDCl}_3$ ):  $\delta$  = 7.00 (dd, 2H, Ar-H), 6.71 (t, 1H, Ar-H), 6.61 (dd, 1H, Ar-H), 3.72 (s, 1H-NH), 3.50 (d, 1H, -NCH), 1.62-1.33 (m, 10H,  $-(\text{CH}_2)_5-$ ), 1.23 (d, 3H,  $-\text{CH}_3$ ), 0.92 (d, 3H,  $-\text{CH}_3$ ).  $^{13}\text{C NMR}$  (100 MHz,  $\text{CDCl}_3$ ):  $\delta$  = 143.58, 129.35, 127.86, 119.10, 116.54, 111.60, 48.54, 37.18, 31.97, 29.48, 26.21, 22.79, 20.89, 14.27.

IR(KBr,  $\text{cm}^{-1}$ ): 3420,3073,2959,2928,2856,1598,1512,1463,1324,1163,1033,739,439.

HRMS Calcd. for  $\text{C}_{14}\text{H}_{22}\text{FN}$ : 223.1736. Found: 223.1736.

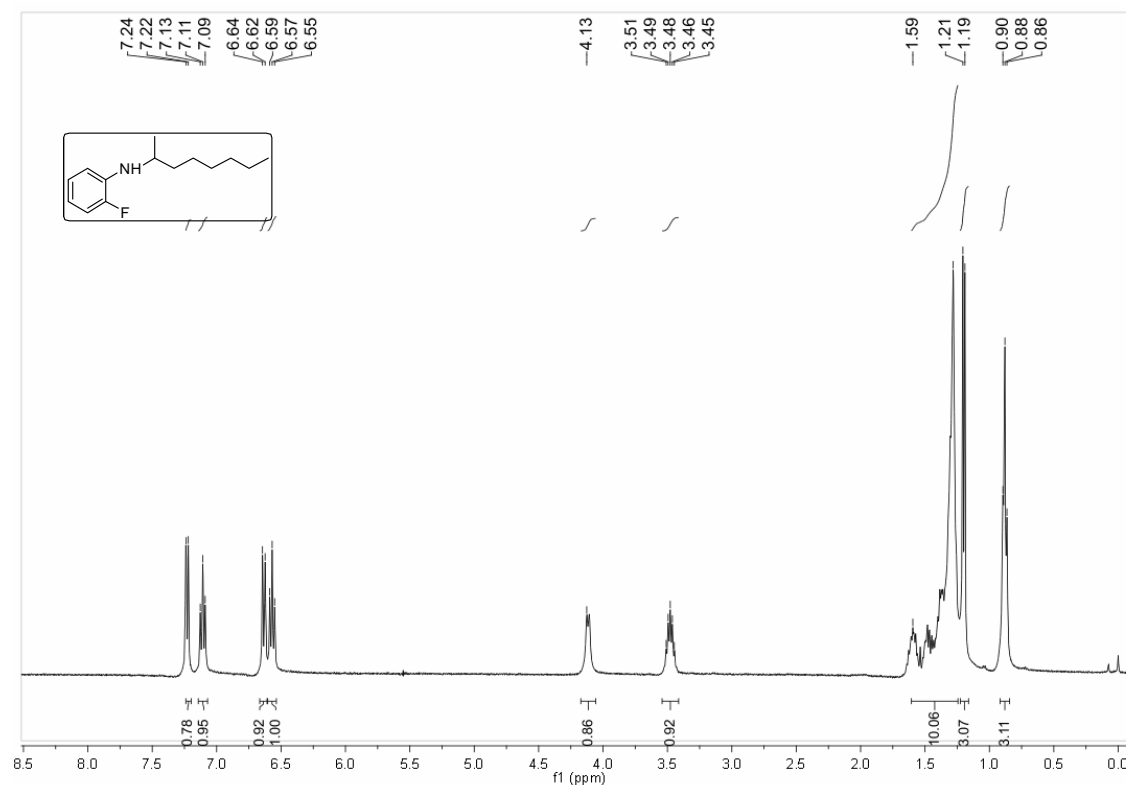

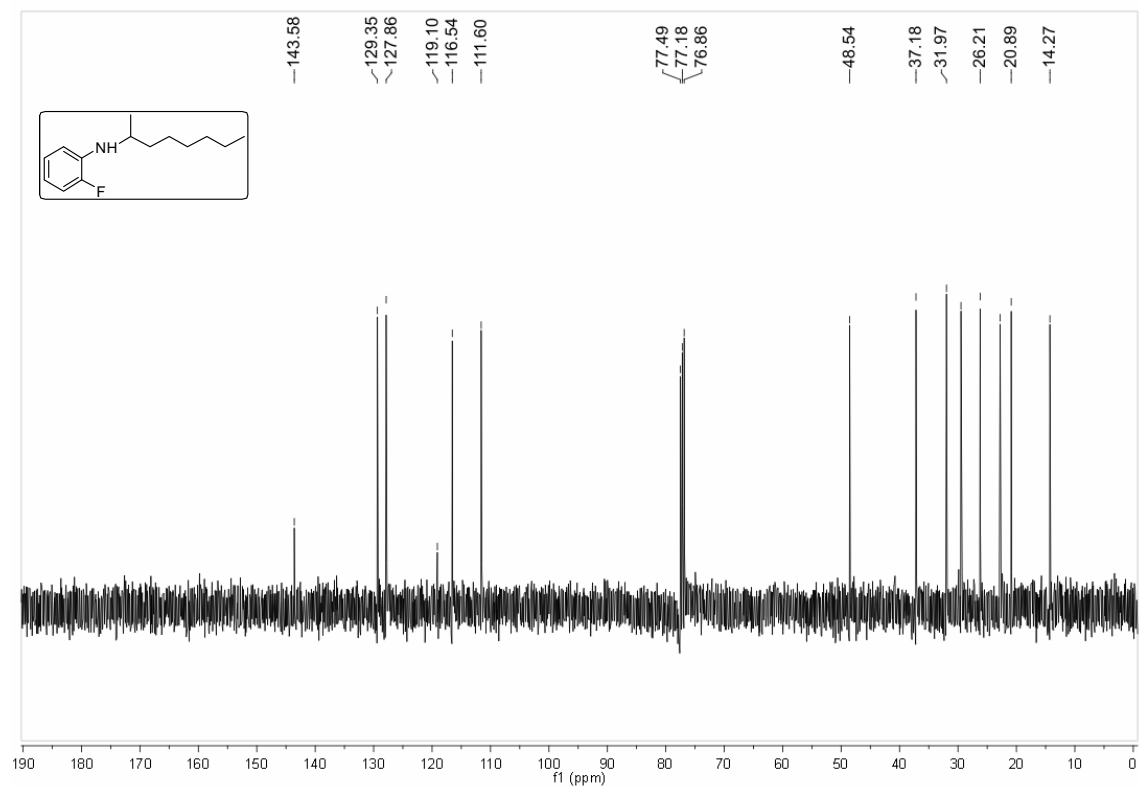

Supplement: c1ra00408e.pdf [file c1ra00408e.pdf]
